# Supplementary material for: Rhodium(iii)-catalysed redox neutral alkylation of 3-arylbenzo[d]isoxazoles: easy access to substituted succinimides
Source: Royal Society of Chemistry journal article supplement (doi:10.1039/d3ob00851g), 2023-01-01

# Rhodium(III)-catalysed redox neutral alkylation of 3-arylbenzo[*d*]isoxazoles: Easy access to substituted succinimides

Xuelin Yue,<sup>a</sup> Xiang Zhao,<sup>a</sup> Junwei Huang,<sup>a</sup> Yijie Gao,<sup>a</sup> Yadong Feng<sup>b</sup> and Xiuling Cui<sup>\*a</sup>

<sup>a</sup> Engineering Research Centre of Molecular Medicine of Ministry of Education, Key Laboratory of Fujian Molecular Medicine, Key Laboratory of Precision Medicine and Molecular Diagnosis of Fujian Universities, Key Laboratory of Xiamen Marine and Gene Drugs, School of Biomedical Sciences, Huaqiao University, Xiamen 361021, P. R. China.

<sup>b</sup> Engineering Research Center of Natural Cosmeceuticals College of Fujian Province and Department of Public Health and Medical Technology, Xiamen Medical College, Xiamen, Fujian 361023, P. R. China.

*Supporting Information Placeholder*

Corresponding Author: Xiuling Cui

Email: [cuixl@hqu.edu.cn](mailto:cuixl@hqu.edu.cn)

Tel & Fax: +86-592-6162996

|                                                          |     |
|----------------------------------------------------------|-----|
| 1. General information.....                              | S1  |
| 2. General procedure for the synthesis of <b>3</b> ..... | S1  |
| 3. Mechanism experiments.....                            | S2  |
| 4. References .....                                      | S4  |
| 5. Characterization of products <b>3</b> .....           | S5  |
| 6. NMR spectra of products <b>3</b> .....                | S15 |

## 1. General information

Unless otherwise stated, all commercial materials and solvents were used directly without further purification.  $^1\text{H}$  and  $^{13}\text{C}$  NMR spectra were measured on a 400 MHz Bruker spectrometer ( $^1\text{H}$  400MHz,  $^{13}\text{C}$  100MHz,  $^{19}\text{F}$  NMR 376 MHz), using  $\text{CDCl}_3$  (spectra were referenced to the solvent peaks  $^1\text{H}$ : residual  $\text{CDCl}_3 = 7.26$  ppm,  $^{13}\text{C}$ :  $\text{CDCl}_3 = 77.0$  ppm) or  $\text{DMSO}-d_6$  (spectra were referenced to the solvent peaks  $^1\text{H}$ : residual  $\text{DMSO}-d_6 = 2.50$  ppm,  $^{13}\text{C}$ :  $\text{DMSO}-d_6 = 39.5$  ppm) as the solvent (s = singlet, d = doublet, t = triplet, q = quartet, dd = doublet of doublet, m = multiplet). High-resolution mass spectra (HRMS) were measured on ESI-TOF. Column chromatography was performed on silica gel (70-230 mesh ASTM) using the reported eluent. Thin-layer chromatography (TLC) was carried out on 4×5 cm plates with a layer thickness of 0.2 mm (silica gel 60 F254). Starting materials 3-phenylbenzo[*d*]isoxazoles **1** [1-2] were prepared according to the literatures, maleimides **2** are commercially available.

## 2. General procedure for the synthesis of **3**

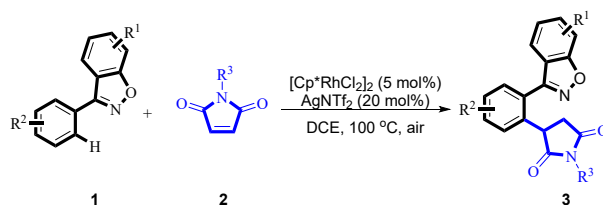

A reaction tube (25 mL) equipped with a magnetic stirrer bar was charged with 3-phenylbenzo[*d*]isoxazoles **1** (0.2 mmol, 1.0 eq), maleimides **2** (0.24 mmol, 1.2 eq),  $[\text{RhCp}^*\text{Cl}_2]_2$  (0.0050 mmol, 5 mol%),  $\text{AgNTf}_2$  (0.02 mmol, 20 mol%), DCE (2 mL). The reaction mixture was stirred at 100 °C (metal module heating) for 12 h under air. After cooled to room temperature, the resulting mixture was diluted by DCM, then was concentrated under reduced pressure. The residue was purified by silica gel chromatography (eluent: petroleum ether/ethyl acetate = 5:1) to afford the desired product **3**.

### 3. Mechanism experiments

#### (1) H/D exchange

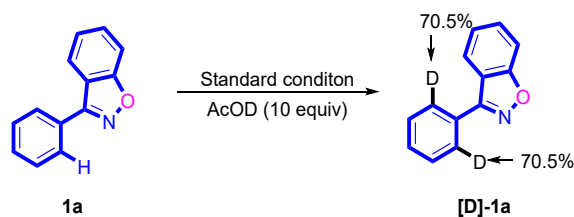

A reaction tube (25 mL) equipped with a magnetic stirrer bar was charged with **1a** (0.2 mmol, 39 mg, 1.0 eq), [RhCp\*Cl<sub>2</sub>]<sub>2</sub> (0.0050 mmol, 6.18 mg, 5 mol%), AgNTf<sub>2</sub> (0.02 mmol, 11.5 mg, 20 mol%), AcOD (2 mmol, 120 mg, 10 eq), DCE (2 mL). The reaction mixture was stirred at 100 °C (metal module heating) for 12 h under air. After cooled to room temperature, the resulting mixture was diluted by DCM, then concentrated under reduced pressure. The residue was purified by silica gel chromatography (eluent: petroleum ether/ethyl acetate = 20:1) to afford the desired product **[D]-1a**. The deuterium incorporation was calculated based on the <sup>1</sup>H NMR spectrum.

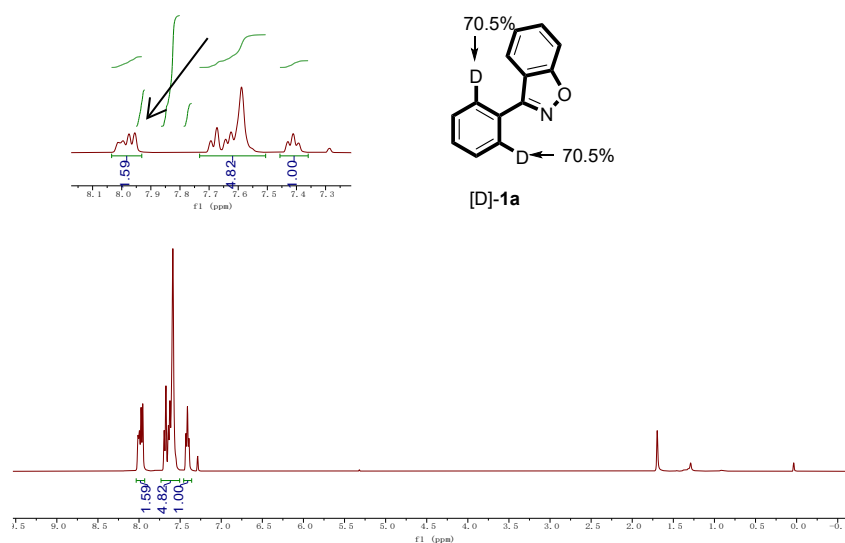

#### (2) KIE experiment

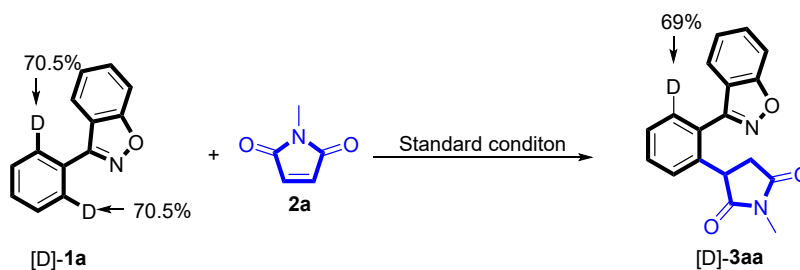

A reaction tube (25 mL) equipped with a magnetic stirrer bar was charged with [D]-**1a** (0.2 mmol, 39 mg, 1.0 eq), maleimide **2a** (26.6 mg, 0.24 mmol, 1.2 eq), [RhCp\*Cl<sub>2</sub>]<sub>2</sub> (0.0050 mmol, 6.18 mg, 5 mol%), AgNTf<sub>2</sub> (0.02 mmol, 11.5 mg, 20 mol%), DCE (2 mL). The reaction mixture was stirred at 100 °C (metal module heating) for 12 h under air. After cooled to room temperature, the resulting mixture was diluted by DCM, then concentrated under reduced pressure. The residue was purified by silica gel chromatography (eluent: petroleum ether/ethyl acetate = 5:1) to afford the desired product [D]-**3aa**. The value of  $K_H/K_D$  was calculated according to the ratio (70.5% D) of deuterated initial substrate [D]-**1a** and the ratio (69% D) of deuterated products [D]-**3aa**.  $K_H/K_D = (31\%/69\%)/(29.5\%/70.5\%) = 1.07$

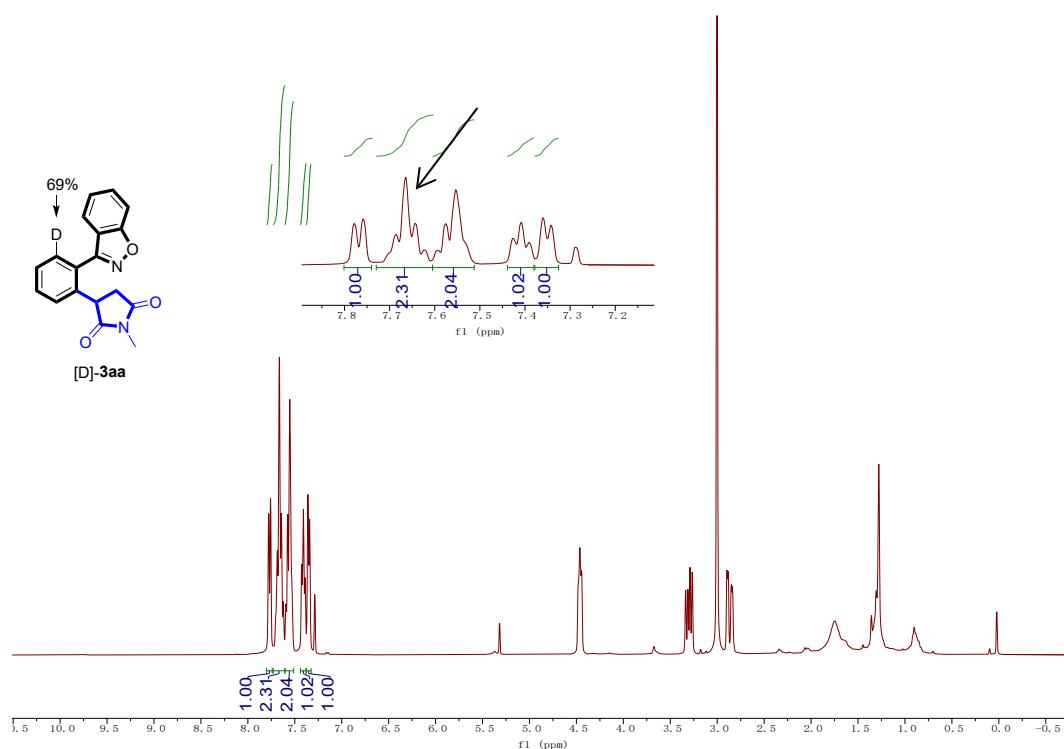

### (3) Competition experiment

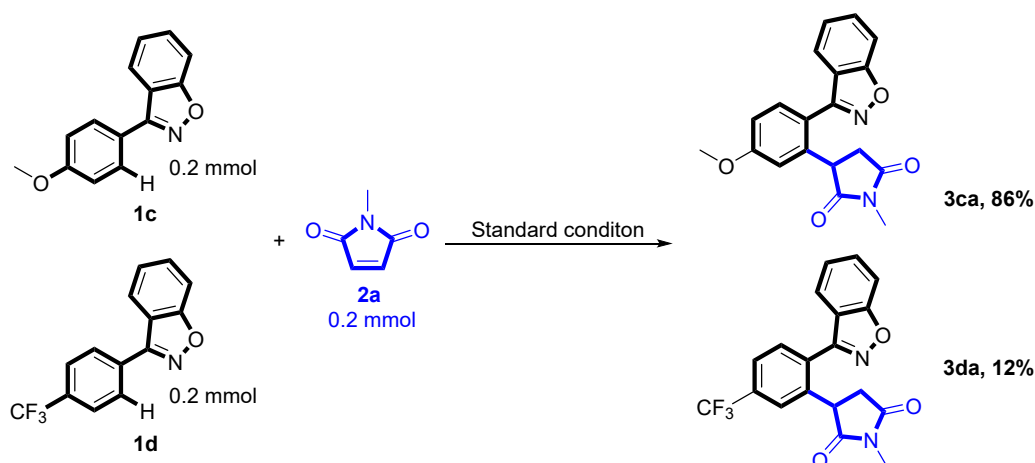

A reaction tube (25 mL) equipped with a magnetic stirrer bar was charged with **1c** (0.2 mmol, 39.0 mg, 1.0 eq), **1d** (0.2 mmol, 52.6 mg, 1.0 eq), maleimide **2a** (22.2 mg, 0.2 mmol, 1.0 eq), [RhCp\*Cl<sub>2</sub>]<sub>2</sub> (0.0050 mmol, 6.18 mg, 5 mol%), AgNTf<sub>2</sub> (0.02 mmol, 11.5 mg, 20 mol%), DCE (2 mL). The reaction mixture was stirred at 100 °C (metal module heating) for 12 h under air. After cooled to room temperature, the resulting mixture was diluted by DCM, then concentrated under reduced pressure. The residue was purified by silica gel chromatography (eluent: petroleum ether/ethyl acetate = 5:1) to afford the desired products **3ca** and **3da** with ~7:1 ratio.

#### 4. References:

1. Duan, P.; Yang, Y.; Ben, R.; Yan, Y.; Dai, L.; Hong, M.; Wu, Y.-D.; Wang, D.; Zhang, X.; Zhao, J., Palladium-catalyzed benzo [*d*] isoxazole synthesis by C-H activation/ 4+1 annulation. *Chem. Sci.* **2014**, 5 (4), 1574-1578.
2. Noguchi, T.; Nishii, Y.; Miura, M., Rhodium-catalyzed Synthesis of 1-Arylisoquinoline Derivatives through Annulative Coupling of 3-Aryl-1,2-benzisoxazoles and Alkynes. *Chem. Lett.* **2017**, 46 (10), 1512-1514.

## 5. Characterization of compounds 3

### 3-(2-(Benzo[d]isoxazol-3-yl)phenyl)-1-methylpyrrolidine-2,5-dione (3aa)

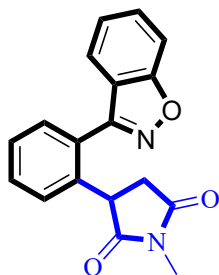

White solid, 93% yield, 57.0 mg, m.p.: 58-59 °C,  $^1\text{H}$  NMR (400 MHz, Chloroform-*d*)  $\delta$  7.76 (d,  $J$  = 8.1 Hz, 1H), 7.73 – 7.58 (m, 3H), 7.60 – 7.50 (m, 2H), 7.40 (t,  $J$  = 7.3 Hz, 1H), 7.35 (d,  $J$  = 7.3 Hz, 1H), 4.45 (dd,  $J$  = 9.5, 6.5 Hz, 1H), 3.29 (dd,  $J$  = 18.3 Hz, 9.6 Hz, 1H), 2.99 (s, 3H), 2.86 (dd,  $J$  = 18.2, 5.3 Hz, 1H).

$^{13}\text{C}$  NMR (100 MHz, Chloroform-*d*)  $\delta$  178.0, 176.1, 163.4, 157.1, 137.4, 130.8, 130.3, 129.1, 128.2, 128.0, 124.3, 122.3, 121.5, 110.0, 44.5, 39.0, 25.1. HRMS (ESI) calcd for  $\text{C}_{18}\text{H}_{15}\text{N}_2\text{O}_3$  [ $\text{M} + \text{H}$ ] $^+$  307.1077; found: 307.1076.

### 3-(2-(Benzo[d]isoxazol-3-yl)-5-methylphenyl)-1-methylpyrrolidine-2,5-dione (3ba)

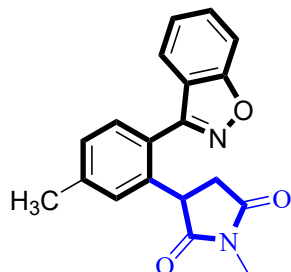

White solid, 94% yield, 60.2 mg, m.p.: 82-83 °C,  $^1\text{H}$  NMR (400 MHz, Chloroform-*d*)  $\delta$  7.76 (d,  $J$  = 8.0 Hz, 1H), 7.65 (t,  $J$  = 8.8 Hz, 2 H), 7.58 (d,  $J$  = 8.0 Hz, 1H), 7.39 (t,  $J$  = 7.3 Hz, 1H), 7.34 (d,  $J$  = 8.0 Hz, 1H), 7.13 (s, 1H), 4.45 (dd,  $J$  = 9.8, 5.6 Hz, 1H), 3.29 (dd,  $J$  = 18.5, 9.8 Hz, 1H), 3.02 (s, 3H), 2.85 (dd,  $J$  = 18.5, 5.6 Hz, 1H), 2.46 (s, 3H).

$^{13}\text{C}$  NMR (100 MHz, Chloroform-*d*)  $\delta$  178.2, 176.2, 163.4, 157.1, 141.0, 137.2, 130.6, 130.2, 129.7, 129.1, 125.0, 124.1, 122.3, 121.6, 109.9, 44.4, 39.0, 25.1, 21.4. HRMS (ESI) calcd for  $\text{C}_{19}\text{H}_{17}\text{N}_2\text{O}_3$  [ $\text{M} + \text{H}$ ] $^+$  321.1234; found: 321.1231.

**3-(2-(Benzo[*d*]isoxazol-3-yl)-5-methoxyphenyl)-1-methylpyrrolidine-2,5-dione (3ca)**

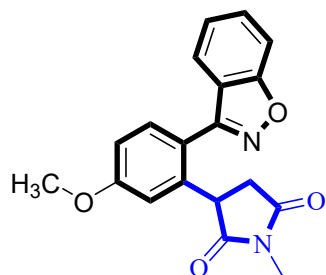

Colorless oil, 99% yield, 66.6 mg,  $^1\text{H NMR}$  (400 MHz, Chloroform-*d*)  $\delta$  7.75 (d,  $J = 7.9$  Hz, 1H), 7.68 – 7.61 (m, 3H), 7.39 (t,  $J = 7.1$  Hz, 1H), 7.05 (d,  $J = 8.5$  Hz, 1H), 6.84 (s, 1H), 4.46 (dd,  $J = 9.5, 5.9$  Hz, 1H), 3.90 (s, 3H), 3.29 (dd,  $J = 18.6, 9.7$  Hz, 1H), 3.00 (s, 3H), 2.86 (dd,  $J = 18.6, 5.6$  Hz, 1H).

$^{13}\text{C NMR}$  (100 MHz, Chloroform-*d*)  $\delta$  177.9, 176.1, 163.3, 161.2, 156.9, 138.9, 132.1, 130.2, 124.1, 122.3, 121.6, 120.1, 115.3, 113.2, 110.0, 55.5, 44.6, 38.8, 25.1. HRMS (ESI) calcd for  $\text{C}_{19}\text{H}_{17}\text{N}_2\text{O}_4$  [ $\text{M} + \text{H}$ ] $^+$  337.1183; found: 337.1182.

**3-(2-(Benzo[*d*]isoxazol-3-yl)-5-(trifluoromethyl)phenyl)-1-methylpyrrolidine-2,5-dione (3da)**

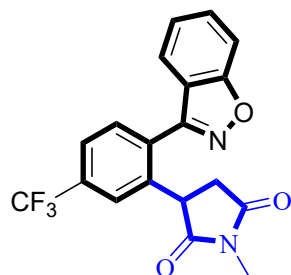

White solid, 81% yield, 60.6 mg, m.p.: 83-84 °C,  $^1\text{H NMR}$  (400 MHz, Chloroform-*d*)  $\delta$  7.87 - 7.78 (m, 2H), 7.76 – 7.65 (m, 3H), 7.63 (s, 1H), 7.44 (t,  $J = 7.3$  Hz, 1H), 4.50 (dd,  $J = 9.8, 6.0$  Hz, 1H), 3.32 (dd,  $J = 18.4, 9.8$  Hz, 1H), 2.99 (s, 3H), 2.91 (dd,  $J = 18.4, 6.0$  Hz, 1H).

$^{13}\text{C NMR}$  (100 MHz, Chloroform-*d*)  $\delta$  177.1, 175.4, 163.5, 156.2, 138.3, 132.8 (q,  $J_{\text{C-F}} = 33.1$  Hz), 131.8, 131.4, 130.7, 126.5 (q,  $J_{\text{C-F}} = 3.7$  Hz), 125.2 (q,  $J_{\text{C-F}} = 3.5$  Hz), 124.6, 123.4 (q,  $J_{\text{C-F}} = 272.8$  Hz), 121.9, 121.0, 110.2, 44.7, 38.6, 25.2.  $^{19}\text{F NMR}$  (376 MHz, Chloroform-*d*)  $\delta$  -62.07. HRMS (ESI) calcd for  $\text{C}_{19}\text{H}_{14}\text{F}_3\text{N}_2\text{O}_3$  [ $\text{M} + \text{H}$ ] $^+$  375.0591; found: 375.0592.

### 3-(2-(Benzo[d]isoxazol-3-yl)-5-fluorophenyl)-1-methylpyrrolidine-2,5-dione (3ea)

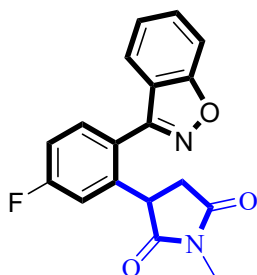

Colorless oil, 91% yield, 59.0 mg,  $^1\text{H}$  NMR (400 MHz, Chloroform-*d*)  $\delta$  7.73 (d,  $J$  = 8.1 Hz, 1H), 7.71 – 7.62 (m, 3H), 7.41 (t,  $J$  = 7.1 Hz, 1H), 7.30 – 7.21 (m, 1H), 7.08 (d,  $J$  = 9.8 Hz, 1H), 4.46 (dd,  $J$  = 9.7, 5.8 Hz, 1H), 3.30 (dd,  $J$  = 18.5, 9.7 Hz, 1H), 3.00 (s, 3H), 2.84 (dd,  $J$  = 18.5, 5.7 Hz, 1H).

$^{13}\text{C}$  NMR (100 MHz, Chloroform-*d*)  $\delta$  177.3, 175.6, 163.7 (d,  $J_{\text{C-F}}$  = 251.6 Hz), 163.4, 156.41, 139.9 (d,  $J_{\text{C-F}}$  = 8.2 Hz), 132.6 (d,  $J_{\text{C-F}}$  = 9.4 Hz), 130.4, 124.4, 124.1 (d,  $J_{\text{C-F}}$  = 3.1 Hz), 122.0, 121.4, 116.4 (d,  $J_{\text{C-F}}$  = 23.2 Hz), 115.6 (d,  $J_{\text{C-F}}$  = 21.6 Hz), 110.1, 44.4, 38.7, 25.2.  $^{19}\text{F}$  NMR (376 MHz, Chloroform-*d*)  $\delta$  -108.89. HRMS (ESI) calcd for  $\text{C}_{18}\text{H}_{14}\text{FN}_2\text{O}_3$  [ $\text{M} + \text{H}$ ] $^+$  325.0983; found: 325.0983.

### 3-(2-(Benzo[d]isoxazol-3-yl)-5-chlorophenyl)-1-methylpyrrolidine-2,5-dione (3fa)

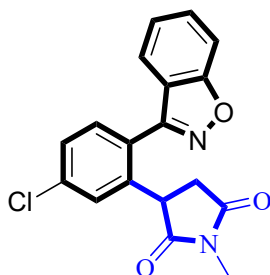

White solid, 89% yield, 60.6 mg, m.p.: 87-88 °C,  $^1\text{H}$  NMR (400 MHz, Chloroform-*d*)  $\delta$  7.73 (d,  $J$  = 8.0 Hz, 1H), 7.71 – 7.59 (m, 3H), 7.53 (d,  $J$  = 7.9 Hz, 1H), 7.42 (t,  $J$  = 7.4 Hz, 1H), 7.35 (s, 1H), 4.44 (t,  $J$  = 7.7 Hz, 1H), 3.30 (dd,  $J$  = 18.6, 9.7 Hz, 1H), 3.00 (s, 3H), 2.86 (dd,  $J$  = 18.5, 5.7 Hz, 1H).

$^{13}\text{C}$  NMR (100 MHz, Chloroform-*d*)  $\delta$  177.3, 175.6, 163.5, 156.3, 139.1, 136.8, 131.9, 130.5, 129.5, 128.6, 126.6, 124.5, 122.0, 121.2, 110.1, 44.4, 38.7, 25.2. HRMS (ESI) calcd for  $\text{C}_{18}\text{H}_{14}\text{ClN}_2\text{O}_3$  [ $\text{M} + \text{H}$ ] $^+$  341.0687; found: 341.0685.



**3-(2-(Benzo[d]isoxazol-3-yl)-5-bromophenyl)-1-methylpyrrolidine-2,5-dione (3ga)**

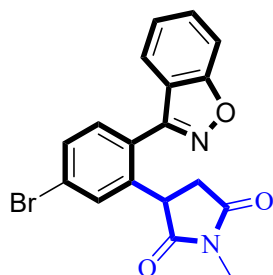

White solid, 91% yield, 70.1 mg, m.p.: 88-89 °C, <sup>1</sup>H NMR (400 MHz, Chloroform-*d*) δ 7.73 (d, *J* = 8.0 Hz, 1H), 7.71 – 7.61 (m, 3H), 7.57 (d, *J* = 8.2 Hz, 1H), 7.50 (s, 1H), 7.42 (t, *J* = 7.2 Hz, 1H), 4.43 (dd, *J* = 9.8, 5.8 Hz, 1H), 3.30 (dd, *J* = 18.5, 9.7 Hz, 1H), 3.00 (s, 3H), 2.86 (dd, *J* = 18.5, 5.9 Hz, 1H).

<sup>13</sup>C NMR (100 MHz, Chloroform-*d*) δ 177.3, 175.6, 163.5, 156.4, 139.3, 132.4, 132.1, 131.5, 130.5, 127.0, 125.0, 124.5, 122.0, 121.2, 110.1, 44.3, 38.7, 25.2. HRMS (ESI) calcd for C<sub>18</sub>H<sub>14</sub>BrN<sub>2</sub>O<sub>3</sub> [M + H]<sup>+</sup> 385.0182; found: 385.0183.

**3-(2-(Benzo[d]isoxazol-3-yl)-4-bromophenyl)-1-methylpyrrolidine-2,5-dione (3ha)**

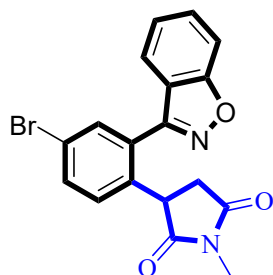

White solid, 87% yield, 67.0 mg, m.p.: 85-86 °C, <sup>1</sup>H NMR (400 MHz, Chloroform-*d*) δ 7.83 (s, 1H), 7.77 (d, *J* = 8.1 Hz, 1H), 7.73 – 7.60 (m, 3H), 7.48 – 7.41 (m, 1H), 7.24 (d, *J* = 8.4 Hz, 1H), 4.40 (dd, *J* = 9.5, 6.2 Hz, 1H), 3.29 (dd, *J* = 18.7, 9.7 Hz, 1H), 2.99 (s, 3H), 2.84 (dd, *J* = 18.5, 5.4 Hz, 1H).

<sup>13</sup>C NMR (100 MHz, Chloroform-*d*<sub>3</sub>) δ 177.5, 175.7, 163.5, 156.0, 136.4, 133.7, 133.4, 130.8, 130.6, 130.1, 124.6, 122.1, 122.0, 121.1, 110.1, 44.2, 38.7, 25.2. HRMS (ESI) calcd for C<sub>18</sub>H<sub>14</sub>BrN<sub>2</sub>O<sub>3</sub> [M + H]<sup>+</sup> 385.0182; found: 385.0181.

### 3-(2-(Benzo[d]isoxazol-3-yl)-3-methoxyphenyl)-1-methylpyrrolidine-2,5-dione (3ia)

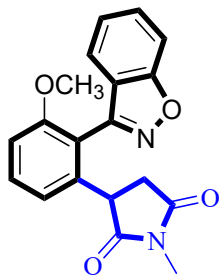

White solid, 85% yield, 57.0 mg, m.p.: 89-90 °C, <sup>1</sup>H NMR (400 MHz, Chloroform-*d*) δ 7.67 – 7.48 (m, 4H), 7.33 (t, *J* = 7.4 Hz, 1H), 7.05 (d, *J* = 8.4 Hz, 1H), 6.90 (d, *J* = 7.8 Hz, 1H), 4.07 (dd, *J* = 9.7, 5.4 Hz, 1H), 3.76 (s, 3H), 3.15 (dd, *J* = 18.6, 9.7 Hz, 1H), 2.95-2.85 (m, 4H).

<sup>13</sup>C NMR (100 MHz, Chloroform-*d*) δ 177.6, 176.0, 163.0, 158.6, 155.2, 139.5, 131.9, 129.9, 123.7, 123.0, 122.5, 120.5, 117.1, 110.6, 109.8, 55.8, 44.5, 38.8, 25.0. HRMS (ESI) calcd for C<sub>18</sub>H<sub>17</sub>N<sub>2</sub>O<sub>4</sub> [M + H]<sup>+</sup> 337.1183; found: 337.1180.

### 3-(2-(6-Chlorobenzo[d]isoxazol-3-yl)phenyl)-1-methylpyrrolidine-2,5-dione (3ja)

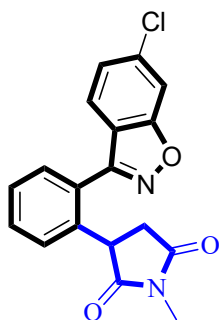

Colorless oil, 88% yield, 59.9 mg, <sup>1</sup>H NMR (400 MHz, Chloroform-*d*) δ 7.74 (s, 1H), 7.65 (d, *J* = 6.6 Hz, 1H), 7.62 – 7.51 (m, 4H), 7.36 (d, *J* = 6.4 Hz, 1H), 4.44 (dd, *J* = 9.2, 5.4 Hz, 1H), 3.29 (dd, *J* = 18.4, 9.6 Hz, 1H), 3.00 (s, 3H), 2.87 (dd, *J* = 18.3, 3.1 Hz, 1H).

<sup>13</sup>C NMR (100 MHz, Chloroform-*d*) δ 177.9, 176.0, 162.0, 156.8, 137.3, 131.0, 130.9, 130.6, 130.0, 129.4, 128.4, 127.3, 122.9, 121.7, 111.1, 44.5, 38.8, 25.1. HRMS (ESI) calcd for C<sub>18</sub>H<sub>14</sub>ClN<sub>2</sub>O<sub>3</sub> [M + H]<sup>+</sup> 341.0687; found: 341.0686.

**1-Methyl-3-(2-(6-nitrobenzo[d]isoxazol-3-yl)phenyl)pyrrolidine-2,5-dione (3ka)**

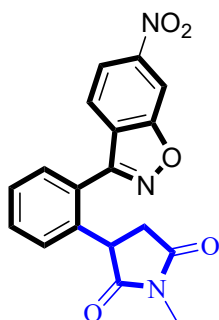

White solid, 51% yield, 35.8 mg, m.p.: 227-228 °C, <sup>1</sup>H NMR (400 MHz, DMSO-*d*<sub>6</sub>) δ 8.67 – 8.49 (m, 2H), 8.12 (d, *J* = 9.3 Hz, 1H), 7.77 (d, *J* = 7.5 Hz, 1H), 7.71 – 7.52 (m, 3H), 4.42 (t, *J* = 7.6 Hz, 1H), 3.13 (dd, *J* = 18.2, 9.7 Hz, 1H), 2.83 – 2.70 (m, 4H).

<sup>13</sup>C NMR (100 MHz, DMSO-*d*<sub>6</sub>) δ 178.4, 176.4, 165.4, 158.9, 145.3, 138.3, 131.8, 131.2, 130.7, 128.8, 126.7, 126.3, 122.5, 120.0, 111.7, 44.3, 38.6, 25.1. HRMS (ESI) calcd for C<sub>18</sub>H<sub>14</sub>N<sub>3</sub>O<sub>5</sub> [M + H]<sup>+</sup> 352.0928; found: 352.0930.

**3-(2-(5-Bromobenzo[d]isoxazol-3-yl)-5-ethoxyphenyl)-1-methylpyrrolidine-2,5-dione (3la)**

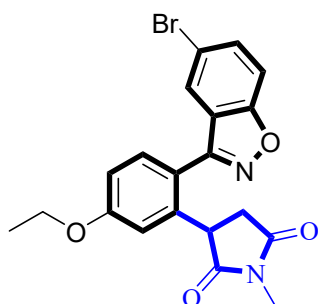

White solid, 93% yield, 80.5 mg, m.p.: 121-122 °C, <sup>1</sup>H NMR (400 MHz, Chloroform-*d*) δ 7.90 (s, 1H), 7.71 (d, *J* = 8.8 Hz, 1H), 7.59 (d, *J* = 8.5 Hz, 1H), 7.54 (d, *J* = 8.8 Hz, 1H), 7.05 (d, *J* = 8.5 Hz, 1H), 6.84 (s, 1H), 4.45 (dd, *J* = 9.7, 5.7 Hz, 1H), 4.13 (q, *J* = 6.9 Hz, 2H), 3.29 (dd, *J* = 18.5, 9.6 Hz, 1H), 3.01 (s, 3H), 2.85 (dd, *J* = 18.5, 5.6 Hz, 1H), 1.48 (t, *J* = 7.0 Hz, 3H).

<sup>13</sup>C NMR (100 MHz, Chloroform-*d*) δ 177.8, 176.0, 162.2, 160.8, 156.4, 138.9, 133.3, 132.0, 124.9, 123.7, 119.1, 117.0, 116.1, 113.6, 111.4, 63.9, 44.5, 38.8, 25.2, 14.7. HRMS (ESI) calcd for C<sub>20</sub>H<sub>18</sub>BrN<sub>2</sub>O<sub>4</sub> [M + H]<sup>+</sup> 429.0444; found: 429.0444.

### 3-(2-(Benzo[d]isoxazol-3-yl)phenyl)-1-ethylpyrrolidine-2,5-dione (3ab)

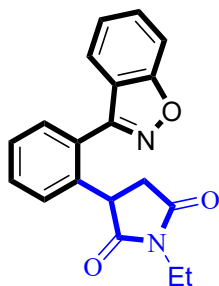

White solid, 90% yield, 57.7 mg, m.p.: 59-60 °C,  $^1\text{H}$  NMR (400 MHz, Chloroform-*d*)  $\delta$  7.77 (d,  $J = 8.1$  Hz, 1H), 7.71 – 7.61 (m, 3H), 7.60 – 7.50 (m, 2H), 7.41 (t,  $J = 6.8$  Hz, 1H), 7.33 (d,  $J = 7.5$  Hz, 1H), 4.44 (dd,  $J = 9.6, 5.7$  Hz, 1H), 3.65 – 3.51 (m, 2H), 3.28 (dd,  $J = 18.5, 9.6$  Hz, 1H), 2.86 (dd,  $J = 18.5, 5.5$  Hz, 1H), 1.18 (t,  $J = 7.4$  Hz, 3H).

$^{13}\text{C}$  NMR (100 MHz, Chloroform-*d*)  $\delta$  177.8, 175.9, 163.4, 157.2, 137.5, 130.8, 130.8, 130.3, 129.0, 128.2, 128.1, 124.2, 122.3, 121.5, 110.0, 44.4, 39.0, 34.0, 13.0. HRMS (ESI) calcd for  $\text{C}_{19}\text{H}_{17}\text{N}_2\text{O}_3$  [ $\text{M} + \text{H}$ ] $^+$  321.1234; found: 321.1234.

### 3-(2-(Benzo[d]isoxazol-3-yl)phenyl)-1-(tert-butyl)pyrrolidine-2,5-dione (3ac)

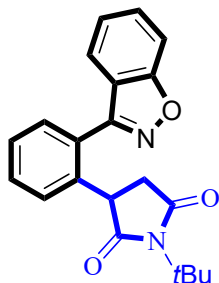

White solid, 89% yield, 62.0 mg, m.p.: 140-141 °C,  $^1\text{H}$  NMR (400 MHz, Chloroform-*d*)  $\delta$  7.76 (d,  $J = 8.0$  Hz, 1H), 7.72 – 7.61 (m, 3H), 7.60 – 7.49 (m, 2H), 7.40 (t,  $J = 7.4$  Hz, 1H), 7.33 (d,  $J = 7.7$  Hz, 1H), 4.30 (dd,  $J = 10.1, 6.2$  Hz, 1H), 3.14 (dd,  $J = 18.2, 10.0$  Hz, 1H), 2.77 (dd,  $J = 18.2, 6.1$  Hz, 1H), 1.58 (s, 9H).

$^{13}\text{C}$  NMR (100 MHz, Chloroform-*d*)  $\delta$  178.9, 177.0, 163.4, 157.3, 138.2, 130.7, 130.2, 128.9, 128.02, 127.98, 124.2, 122.3, 121.7, 110.0, 58.7, 44.4, 39.3, 28.3. HRMS (ESI) calcd for  $\text{C}_{19}\text{H}_{17}\text{N}_2\text{O}_3$  [ $\text{M} + \text{H}$ ] $^+$  349.1547; found: 349.1546.

### 3-(2-(Benzo[d]isoxazol-3-yl)phenyl)-1-benzylpyrrolidine-2,5-dione (3ad)

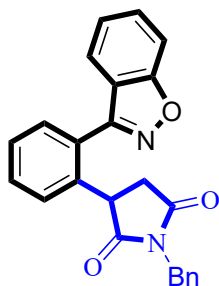

White solid, 70% yield, 53.5 mg, m.p.: 69-70 °C, <sup>1</sup>H NMR (400 MHz, Chloroform-*d*) δ 7.77 (d, *J* = 8.0 Hz, 1H), 7.72 – 7.63 (m, 3H), 7.53 (t, *J* = 4.3 Hz, 2H), 7.45 – 7.37 (m, 3H), 7.36 – 7.30 (m, 3H), 7.26 – 7.20 (m, 1H), 4.74 (d, *J* = 14.0 Hz, 1H), 4.64 (d, *J* = 14.4 Hz, 1H), 4.48 (dd, *J* = 9.8, 5.6 Hz, 1H), 3.31 (dd, *J* = 18.6, 9.7 Hz, 1H), 2.84 (dd, *J* = 18.6, 5.6 Hz, 1H).

<sup>13</sup>C NMR (100 MHz, Chloroform-*d*) δ 177.7, 175.7, 163.4, 157.1, 137.5, 135.8, 130.8, 130.7, 130.3, 128.9, 128.7, 128.2, 128.1, 128.0, 124.2, 122.3, 121.5, 110.0, 44.2, 42.7, 39.1. HRMS (ESI) calcd for C<sub>24</sub>H<sub>19</sub>N<sub>2</sub>O<sub>3</sub> [M + H]<sup>+</sup> 383.1390; found: 383.1393.

### 3-(2-(Benzo[d]isoxazol-3-yl)phenyl)-1-cyclohexylpyrrolidine-2,5-dione (3ae)

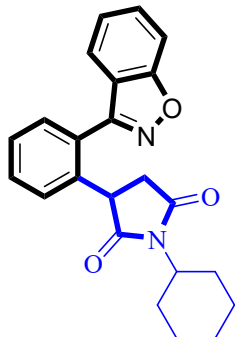

White solid, 80% yield, 59.9 mg, m.p.: 156-157 °C, <sup>1</sup>H NMR (400 MHz, Chloroform-*d*) δ 7.78 (d, *J* = 8.0 Hz, 1H), 7.71 – 7.61 (m, 3H), 7.60 – 7.49 (m, 2H), 7.41 (t, *J* = 7.4 Hz, 1H), 7.31 (d, *J* = 7.5 Hz, 1H), 4.38 (dd, *J* = 9.8, 5.7 Hz, 1H), 4.02 (t, *J* = 12.5 Hz, 1H), 3.22 (dd, *J* = 18.4, 9.7 Hz, 1H), 2.79 (dd, *J* = 18.4, 5.6 Hz, 1H), 2.25 – 2.05 (m, 1H), 1.83 (d, *J* = 12.6 Hz, 2H), 1.70 – 1.55 (m, 4H), 1.41 – 1.25 (m, 3H).

<sup>13</sup>C NMR (100 MHz, Chloroform-*d*) δ 178.0, 176.2, 163.4, 157.2, 137.9, 130.8, 130.7, 130.2, 128.7, 128.1, 124.2, 122.3, 121.6, 110.0, 52.0, 44.0, 38.9, 28.72, 28.68, 25.8, 25.0. HRMS (ESI) calcd for C<sub>23</sub>H<sub>23</sub>N<sub>2</sub>O<sub>3</sub> [M + H]<sup>+</sup> 375.1703; found: 375.1701.

### 3-(2-(Benzo[d]isoxazol-3-yl)-5-methoxyphenyl)-1-phenylpyrrolidine-2,5-dione (3af)

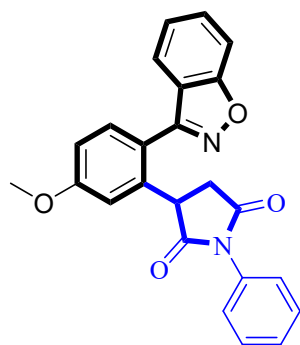

White solid, 61% yield, 48.6 mg, m.p.: 89-91 °C,  $^1\text{H}$  NMR (400 MHz, Chloroform-*d*)  $\delta$  7.78 (d,  $J$  = 8.0 Hz, 1H), 7.73 – 7.59 (m, 3H), 7.52 – 7.43 (m, 2H), 7.44 – 7.35 (m, 2H), 7.30 (d,  $J$  = 7.8 Hz, 2H), 7.09 (d,  $J$  = 8.6 Hz, 1H), 7.00 (s, 1H), 4.66 – 4.57 (m, 1H), 3.92 (s, 3H), 3.44 (dd,  $J$  = 18.5, 9.8 Hz, 1H), 3.08 (dd,  $J$  = 18.6, 6.1 Hz, 1H).

$^{13}\text{C}$  NMR (100 MHz, Chloroform-*d*)  $\delta$  176.7, 175.0, 163.4, 161.2, 157.0, 138.6, 132.3, 132.0, 130.2, 129.1, 128.6, 126.5, 124.2, 122.4, 121.6, 120.0, 116.2, 113.3, 110.0, 55.6, 45.2, 38.7. HRMS (ESI) calcd for  $\text{C}_{24}\text{H}_{19}\text{N}_2\text{O}_4$  [ $\text{M} + \text{H}$ ] $^+$  399.1339; found: 399.1336.

### 3-(2-(Benzo[d]isoxazol-3-yl)-5-methoxyphenyl)-1-(p-tolyl)pyrrolidine-2,5-dione (3ag)

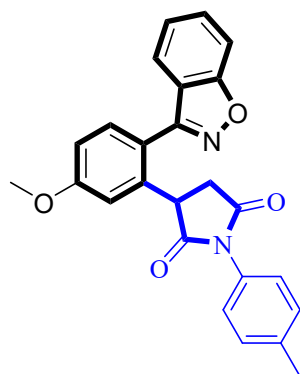

White solid, 55% yield, 45.3 mg, m.p.: 99-100 °C,  $^1\text{H}$  NMR (400 MHz, Chloroform-*d*)  $\delta$  7.78 (d,  $J$  = 8.0 Hz, 1H), 7.73 – 7.59 (m, 3H), 7.39 (t,  $J$  = 7.4 Hz, 1H), 7.28 (d,  $J$  = 7.6 Hz, 2H), 7.17 (d,  $J$  = 8.0 Hz, 2H), 7.09 (d,  $J$  = 8.5 Hz, 1H), 6.99 (s, 1H), 4.60 (dd,  $J$  = 9.8, 6.1 Hz, 1H), 3.92 (s, 3H), 3.43 (dd,  $J$  = 18.6, 9.9 Hz, 1H), 3.07 (dd,  $J$  = 18.5, 6.0 Hz, 1H), 2.39 (s, 3H).

$^{13}\text{C}$  NMR (100 MHz, Chloroform-*d*)  $\delta$  176.8, 175.2, 163.4, 161.2, 157.0, 138.7, 132.3, 130.2, 129.8, 129.4, 126.3, 124.2, 122.4, 121.6, 120.1, 116.1, 113.3, 110.0, 55.6, 45.2, 38.8, 21.2. HRMS (ESI) calcd for  $\text{C}_{25}\text{H}_{21}\text{N}_2\text{O}_4$  [ $\text{M} + \text{H}$ ] $^+$  413.1496; found: 413.1496.

**2-(3-(2-(Benzo[d]isoxazol-3-yl)phenyl)-2,5-dioxopyrrolidin-1-yl)acetic acid (3ah)**

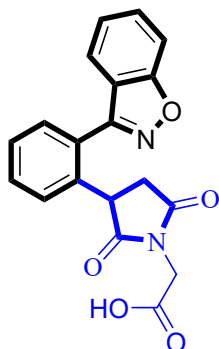

Colorless oil, 71% yield, 49.7 mg,  $^1\text{H}$  NMR (400 MHz, Chloroform-*d*)  $\delta$  7.77 (d,  $J = 8.0$  Hz, 1H), 7.71 – 7.63 (m, 3H), 7.60 – 7.50 (m, 2H), 7.45 (d,  $J = 7.5$  Hz, 1H), 7.40 (t,  $J = 7.5$  Hz, 1H), 4.59 (dd,  $J = 9.8, 5.4$  Hz, 1H), 4.41 – 4.22 (m, 2H), 3.40 (dd,  $J = 18.7, 9.6$  Hz, 1H), 2.93 – 2.84 (m, 1H).

$^{13}\text{C}$  NMR (100 MHz, Chloroform-*d*)  $\delta$  177.5, 175.4, 163.4, 157.1, 137.3, 131.1, 130.5, 130.4, 128.9, 128.3, 128.0, 124.3, 122.3, 121.5, 110.0, 44.1, 39.6, 39.1. HRMS (ESI) calcd for  $\text{C}_{19}\text{H}_{15}\text{N}_2\text{O}_5$   $[\text{M} + \text{H}]^+$  351.0975; found: 351.0978.

**3-(3-(2-(Benzo[d]isoxazol-3-yl)phenyl)-2,5-dioxopyrrolidin-1-yl)propanoic acid (3ai)**

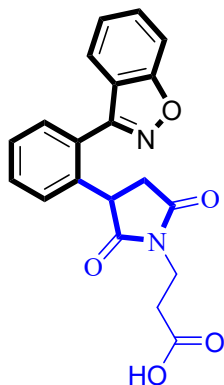

Colorless oil, 88% yield, 64.1 mg,  $^1\text{H}$  NMR (400 MHz, Chloroform-*d*)  $\delta$  7.77 (d,  $J = 8.0$  Hz, 1H), 7.73 – 7.61 (m, 3H), 7.60 – 7.50 (m, 2H), 7.45 – 7.34 (m, 2H), 4.52 – 4.38 (m, 1H), 3.90 – 3.72 (m, 2H), 3.29 (dd,  $J = 18.4, 9.6$  Hz, 1H), 2.88 (dd,  $J = 18.2, 4.1$  Hz, 1H), 2.76 – 2.58 (m, 2H).

$^{13}\text{C}$  NMR (100 MHz, Chloroform-*d*)  $\delta$  177.7, 175.8, 163.4, 157.2, 137.1, 130.83, 130.75, 130.4, 129.5, 128.3, 127.9, 124.3, 122.3, 121.4, 110.0, 44.6, 38.8, 34.5, 31.5. HRMS (ESI) calcd for  $\text{C}_{20}\text{H}_{17}\text{N}_2\text{O}_5$   $[\text{M} + \text{H}]^+$  365.1132; found: 365.1135.

## 6. NMR spectra of products

$^1\text{H}$  NMR (Chloroform-*d*) spectrum of **3aa**

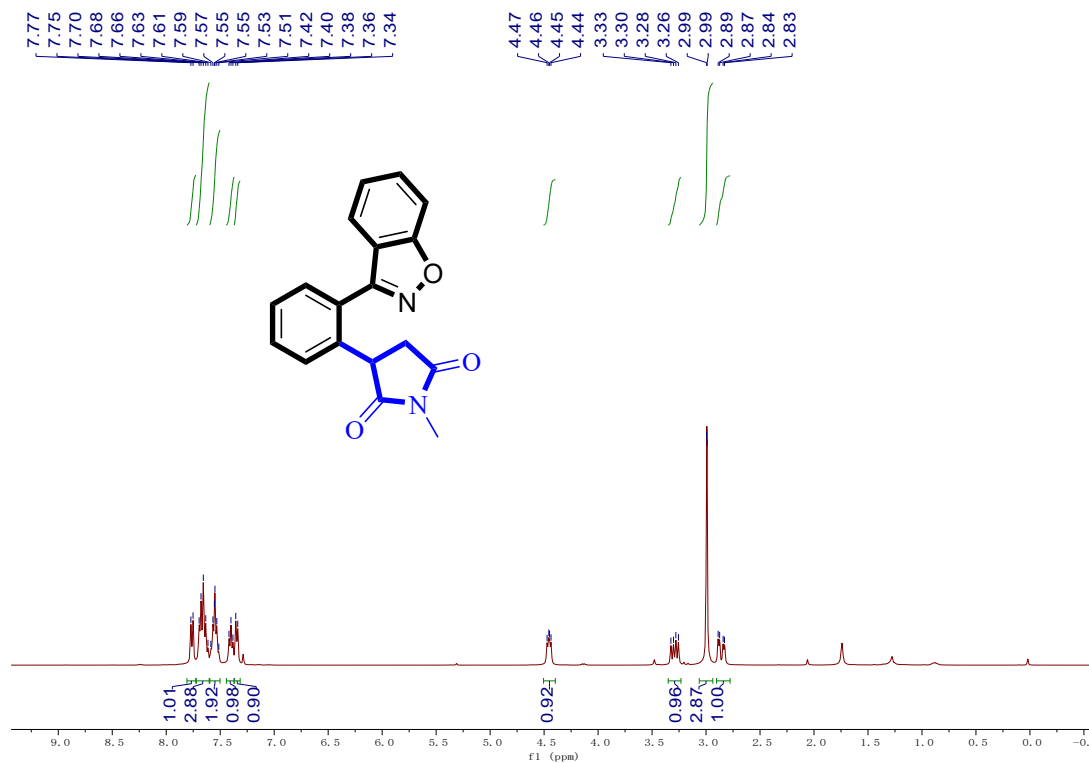

$^{13}\text{C}$  NMR (Chloroform-*d*) spectrum of **3aa**

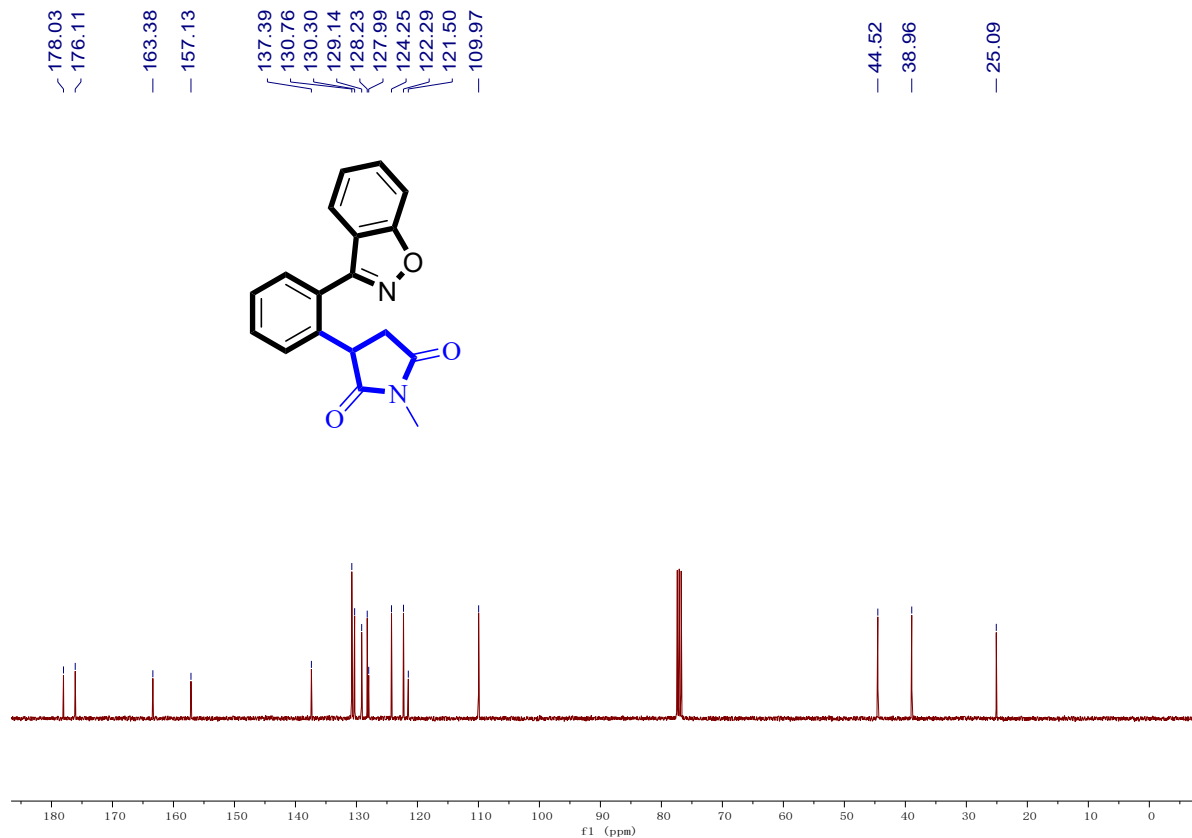



<sup>1</sup>H NMR (Chloroform-d) spectrum of **3ba**

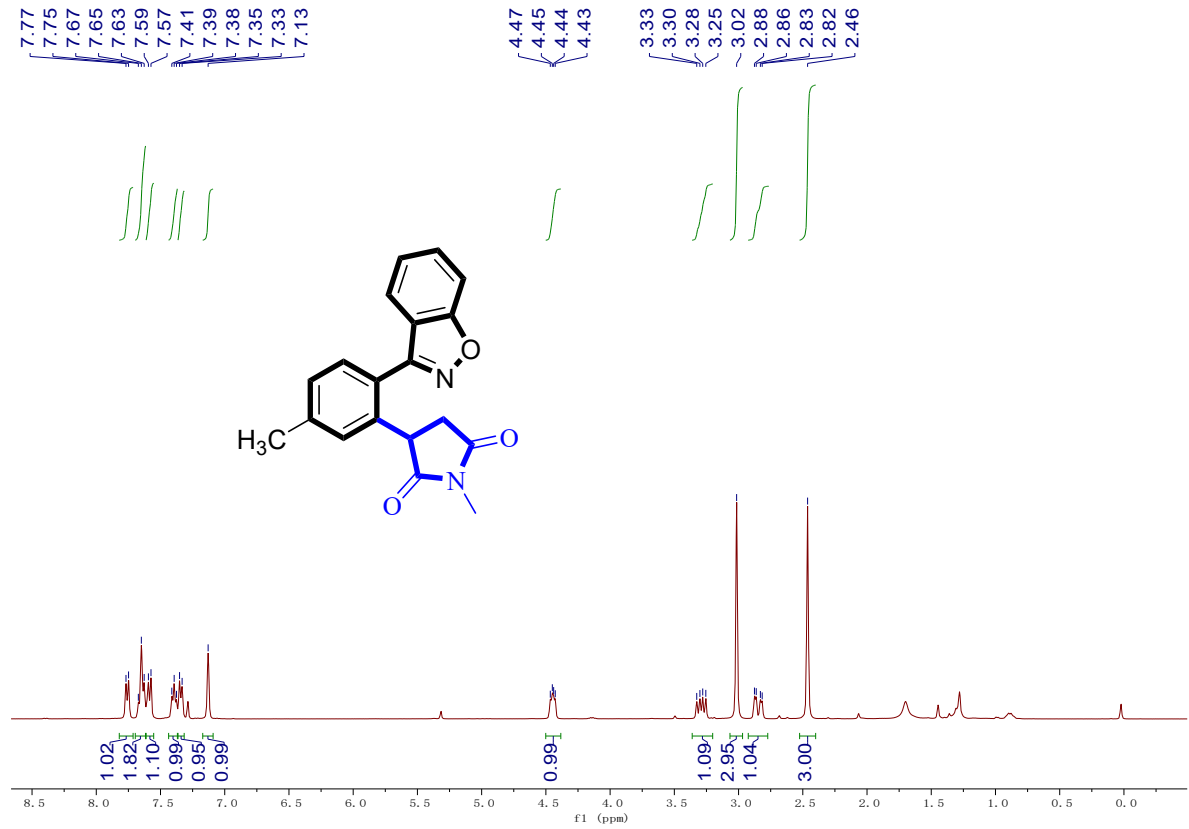

<sup>13</sup>C NMR (Chloroform-d) spectrum of **3ba**

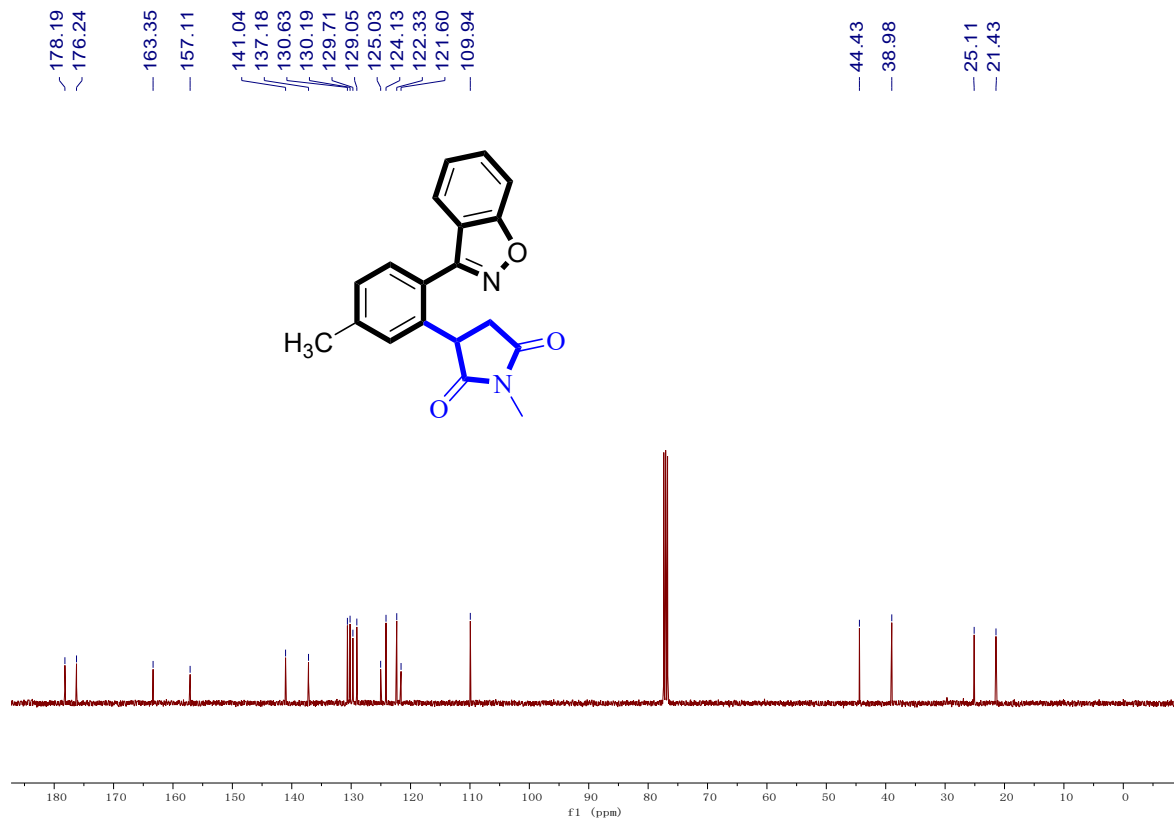

<sup>1</sup>H NMR (Chloroform-*d*) spectrum of **3ca**

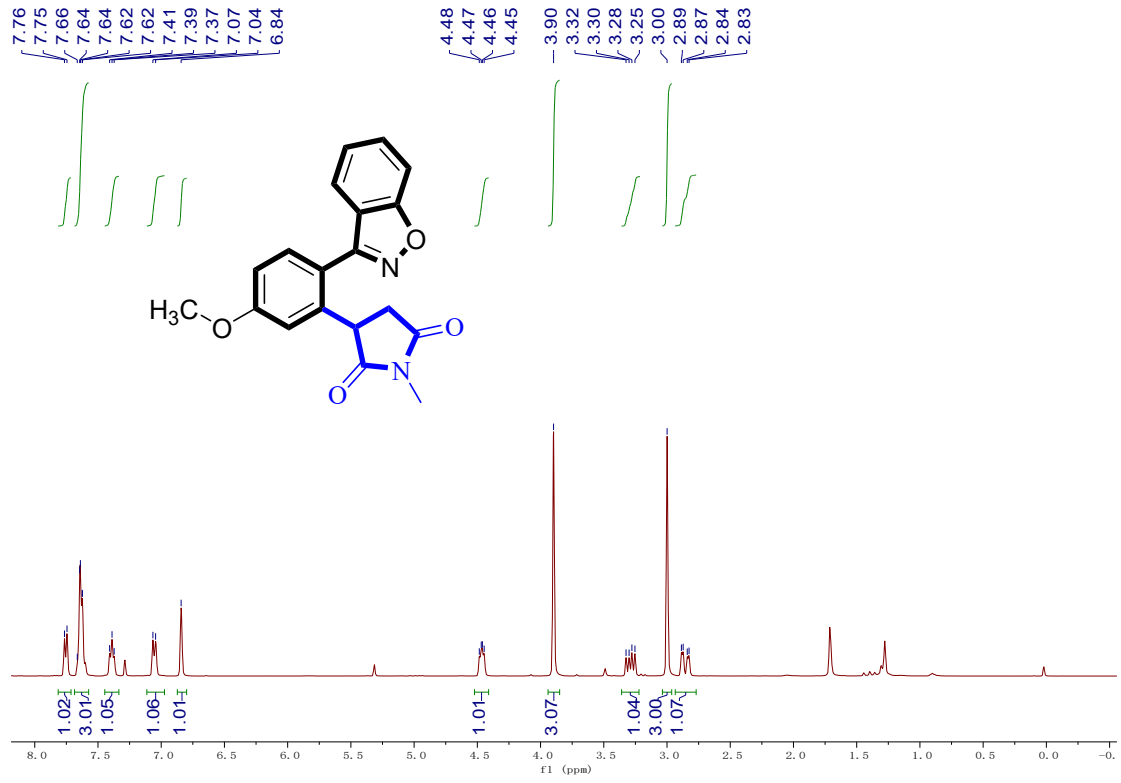

<sup>13</sup>C NMR (Chloroform-*d*) spectrum of **3ca**

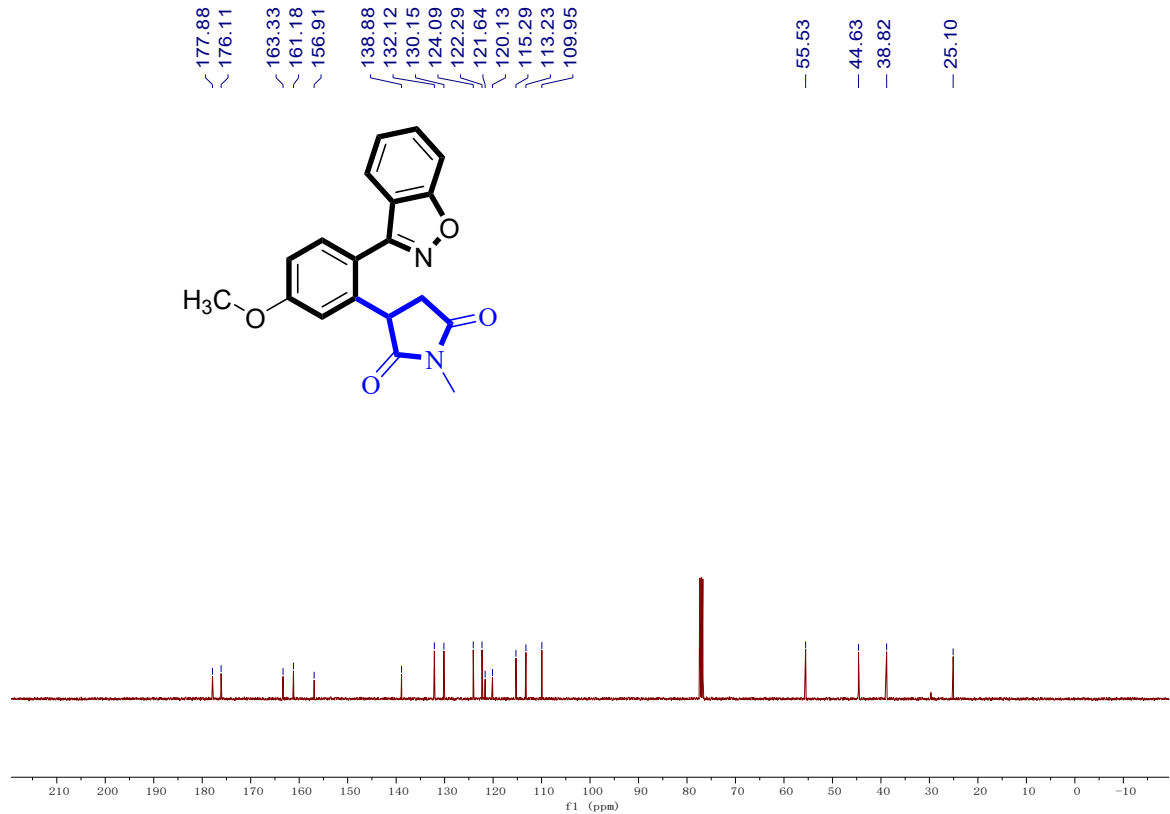

<sup>1</sup>H NMR (Chloroform-*d*) spectrum of **3da**

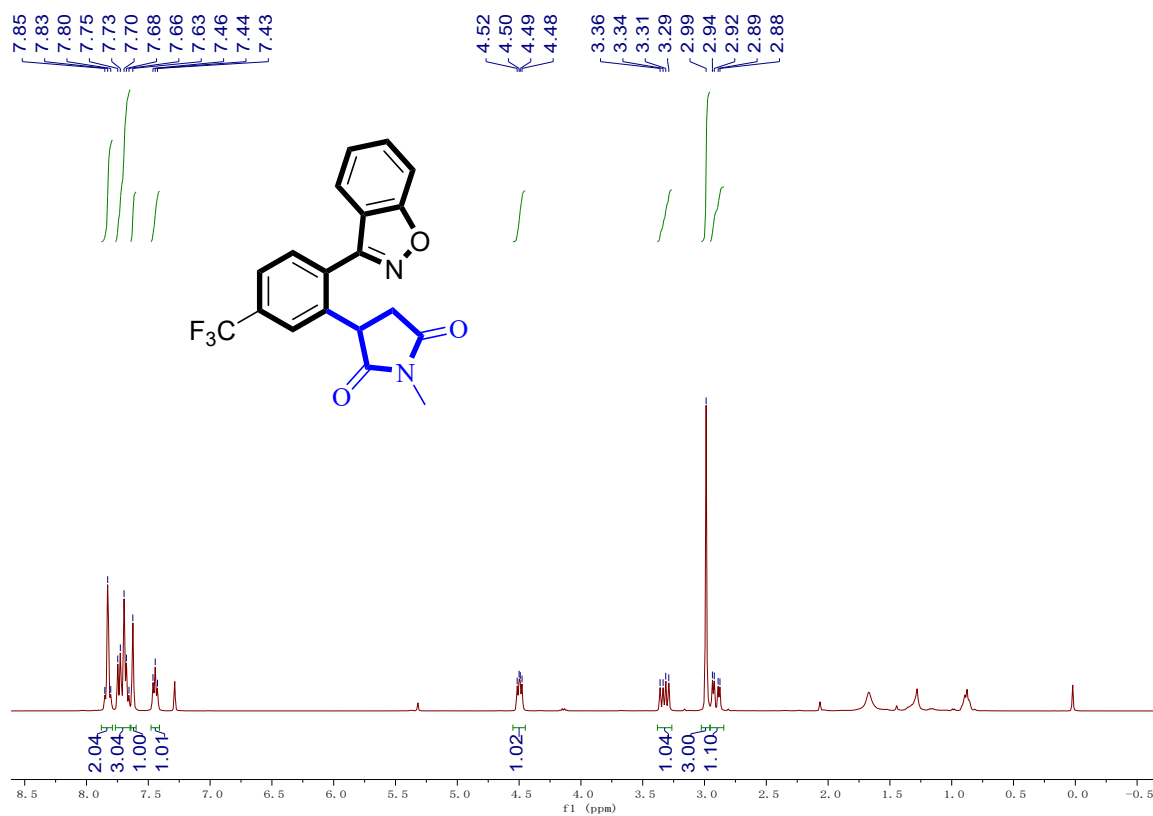

<sup>13</sup>C NMR (Chloroform-*d*) spectrum of **3da**

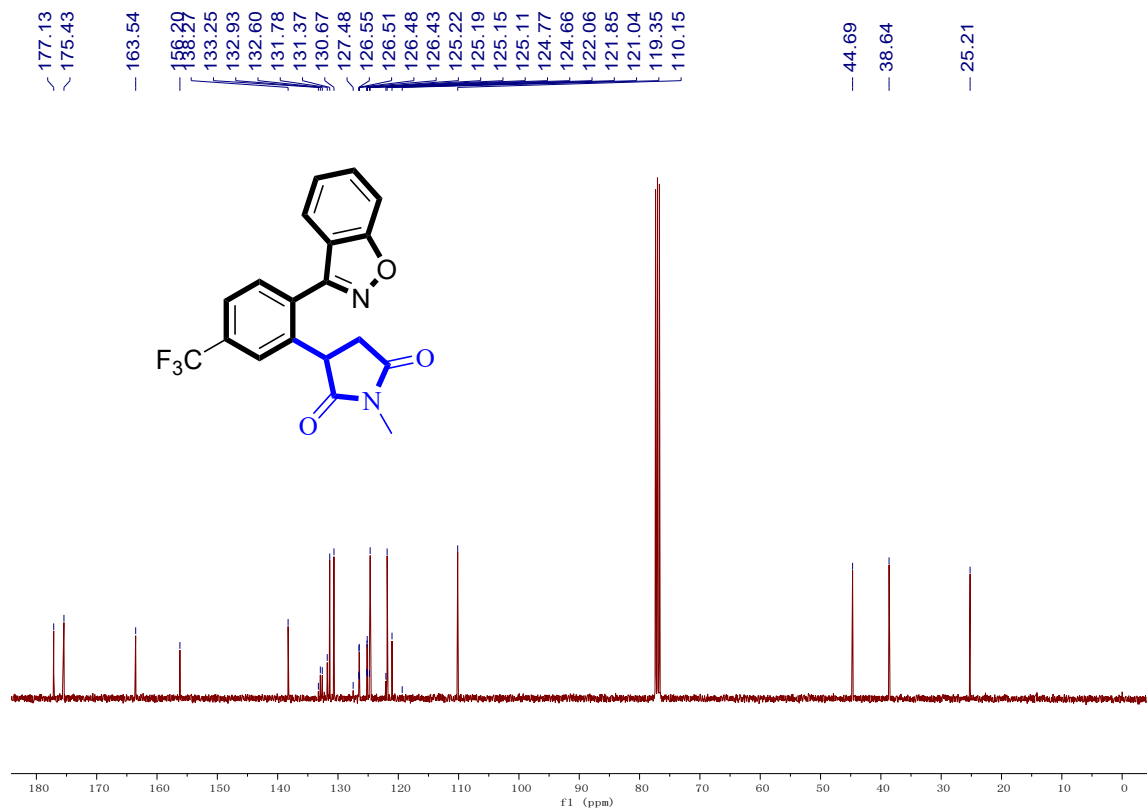

<sup>19</sup>F NMR (DMSO-*d*<sub>6</sub>) spectrum of **3da**

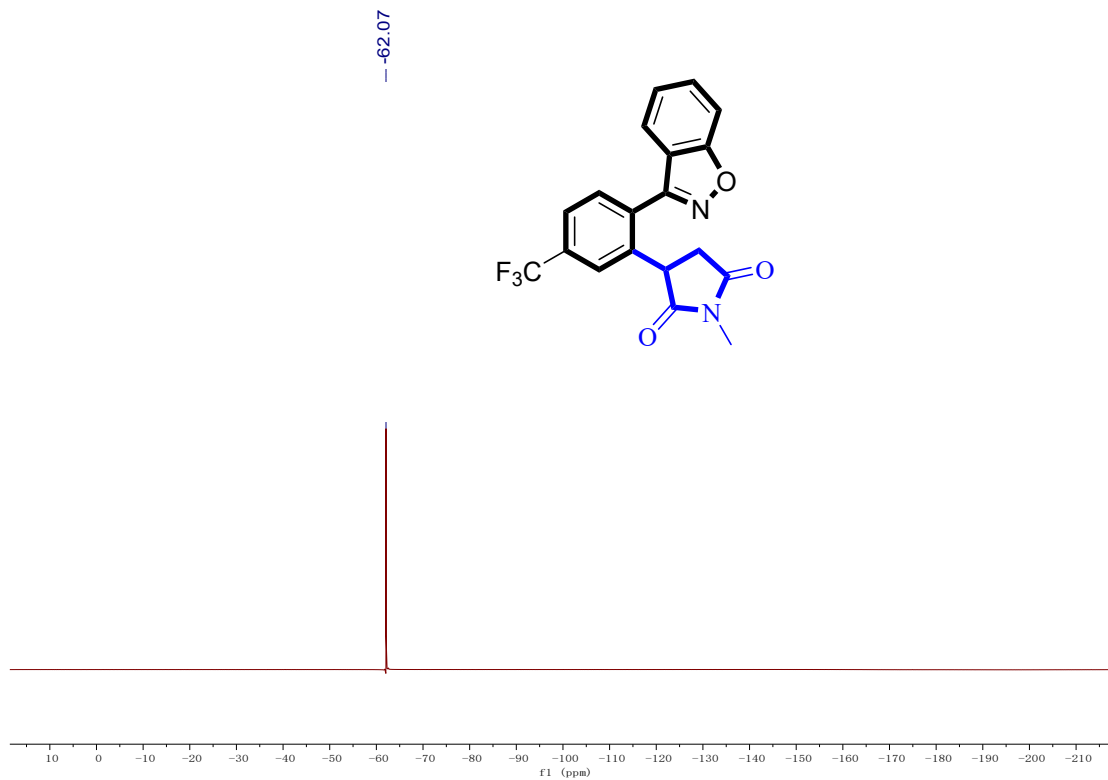

<sup>1</sup>H NMR (Chloroform-*d*) spectrum of **3ea**

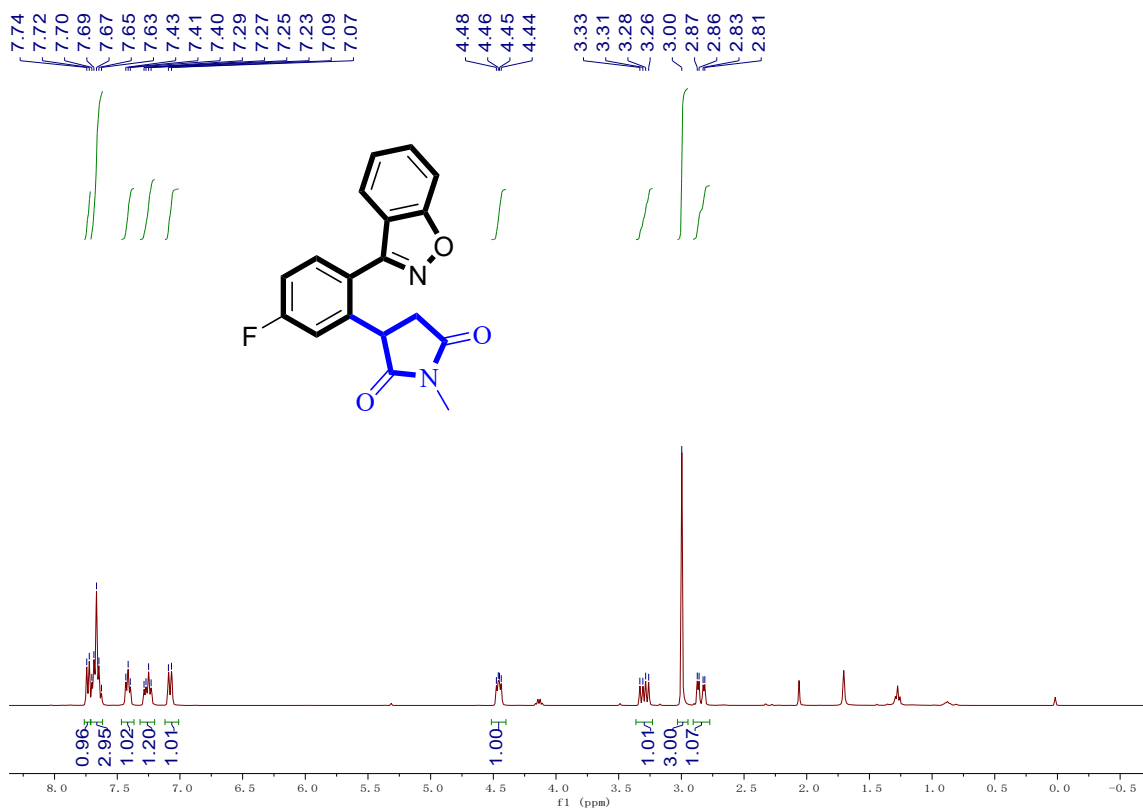

<sup>13</sup>C NMR (Chloroform-*d*) spectrum of **3ea**

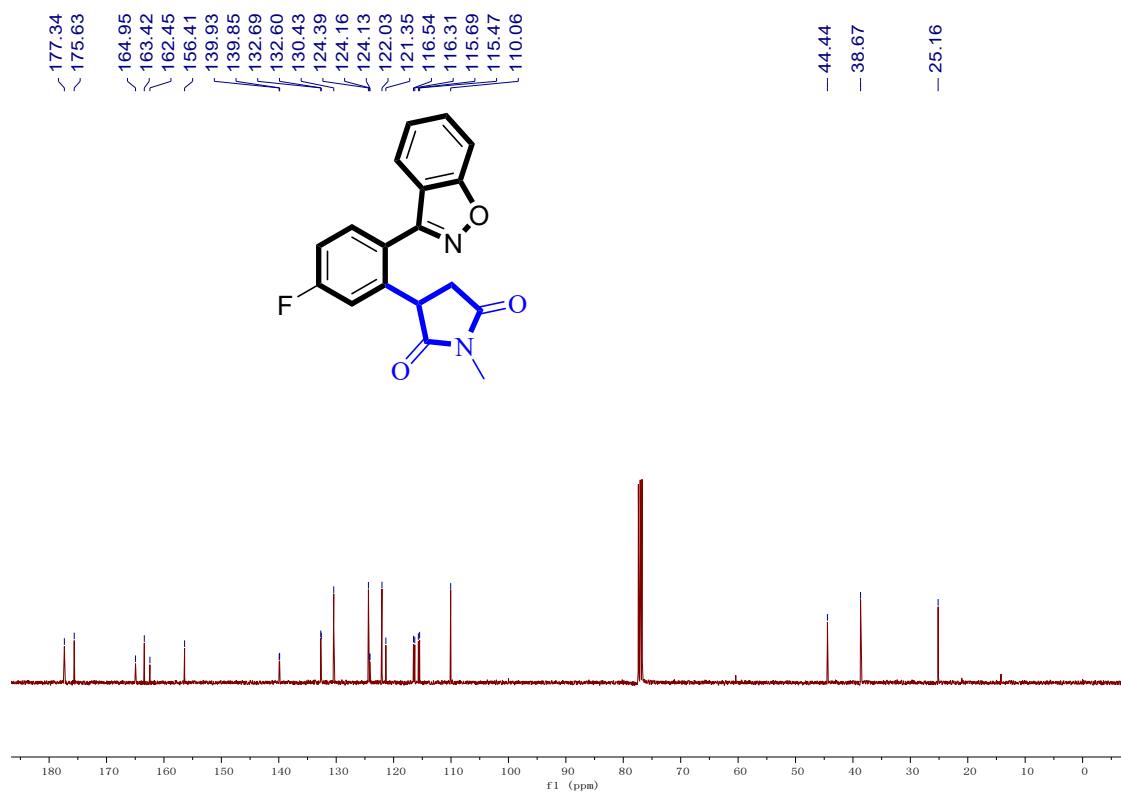

<sup>19</sup>F NMR (DMSO-*d*<sub>6</sub>) spectrum of **3ea**

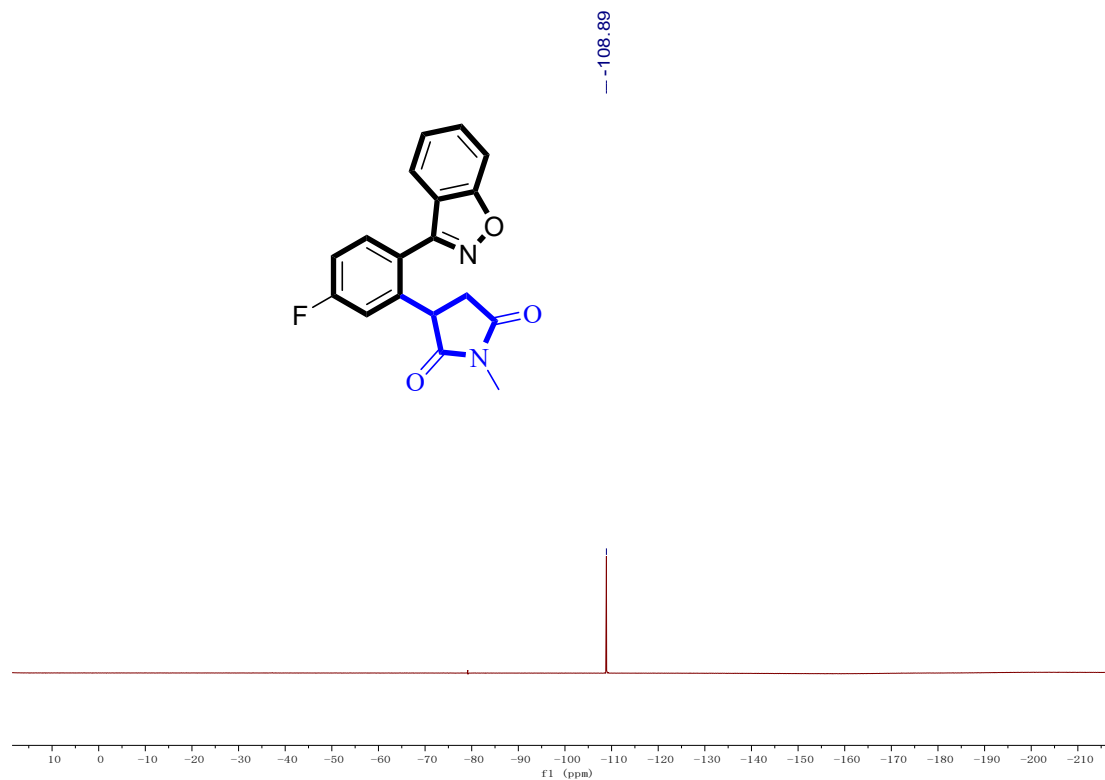

<sup>1</sup>H NMR (Chloroform-*d*) spectrum of **3fa**

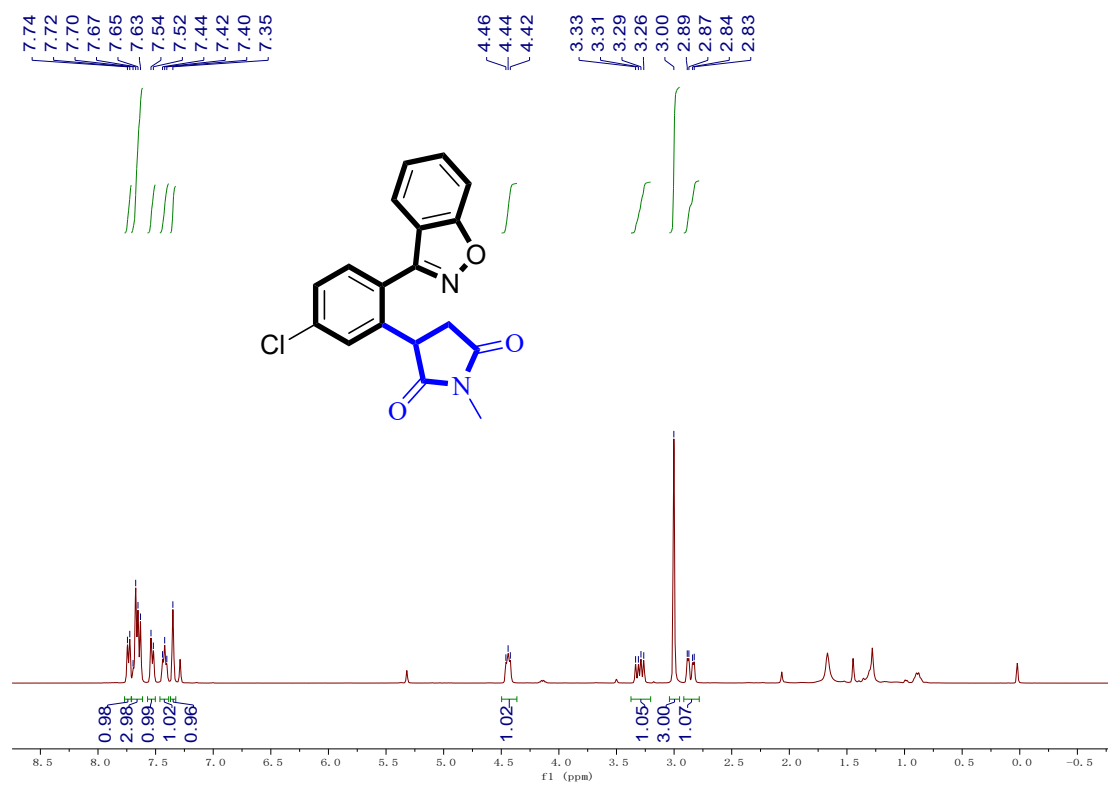

<sup>13</sup>C NMR (Chloroform-*d*) spectrum of **3fa**

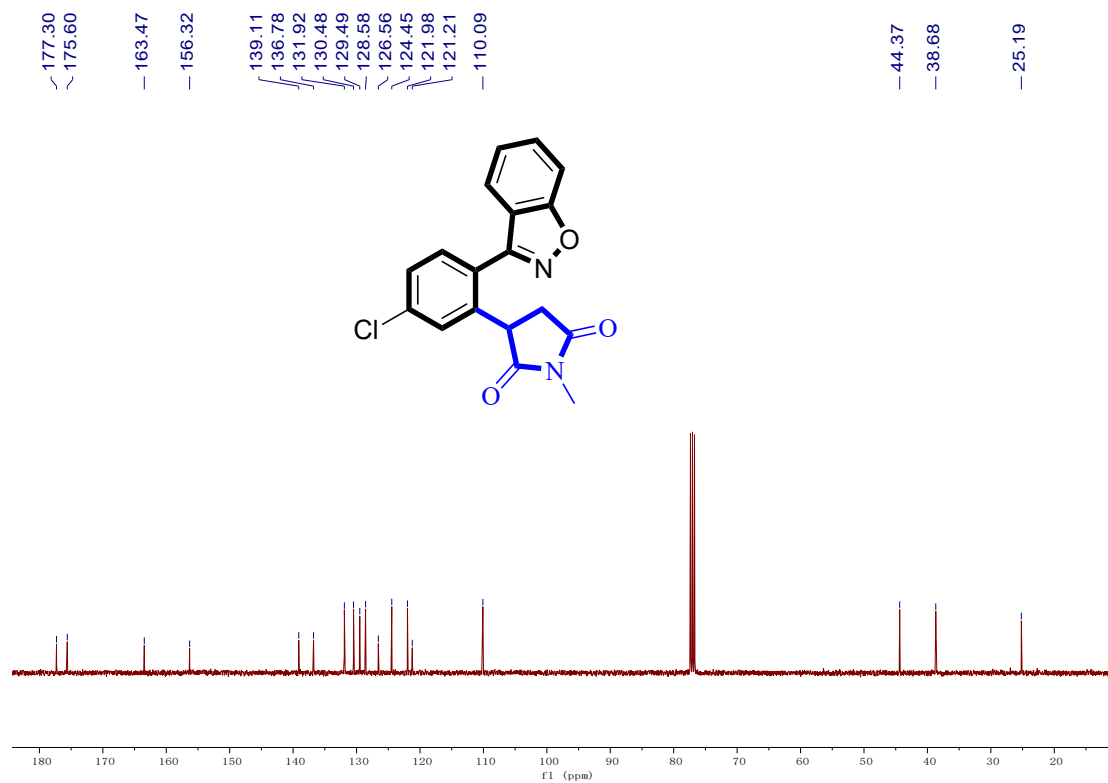

<sup>1</sup>H NMR (Chloroform-*d*) spectrum of **3ga**

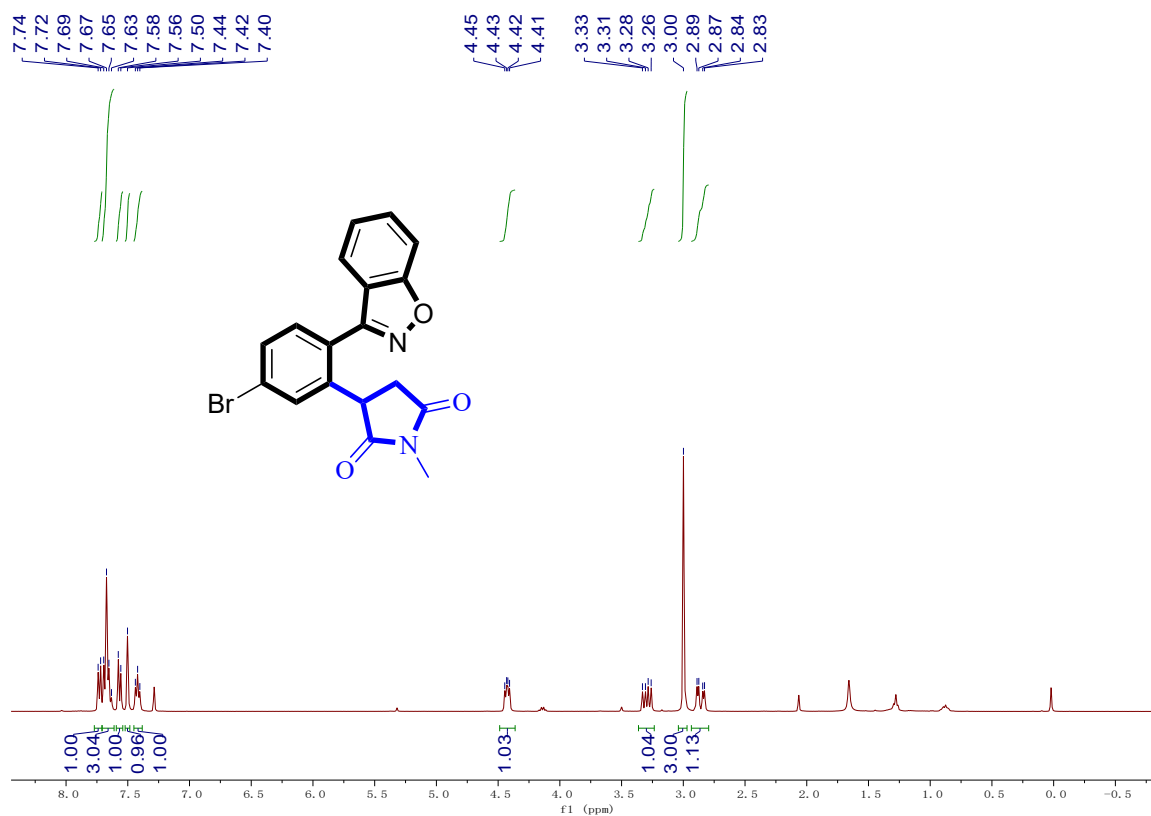

<sup>13</sup>C NMR (Chloroform-*d*) spectrum of **3ga**

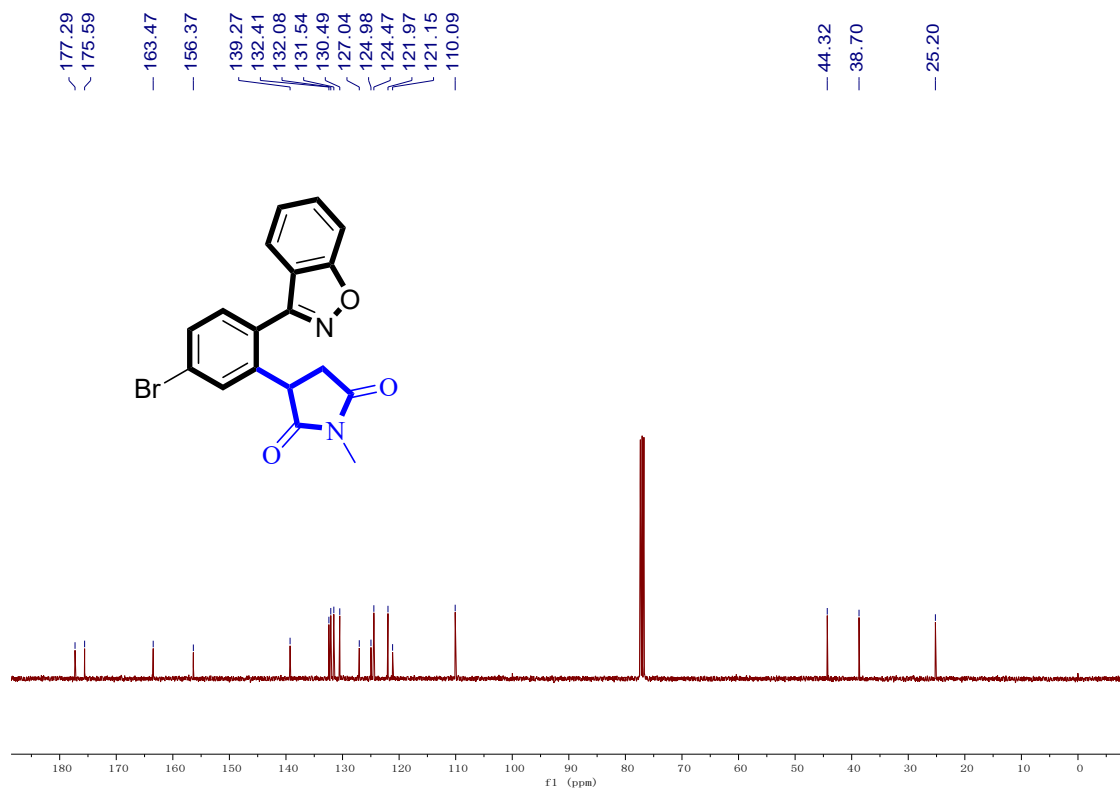

<sup>1</sup>H NMR (Chloroform-*d*) spectrum of **3ha**

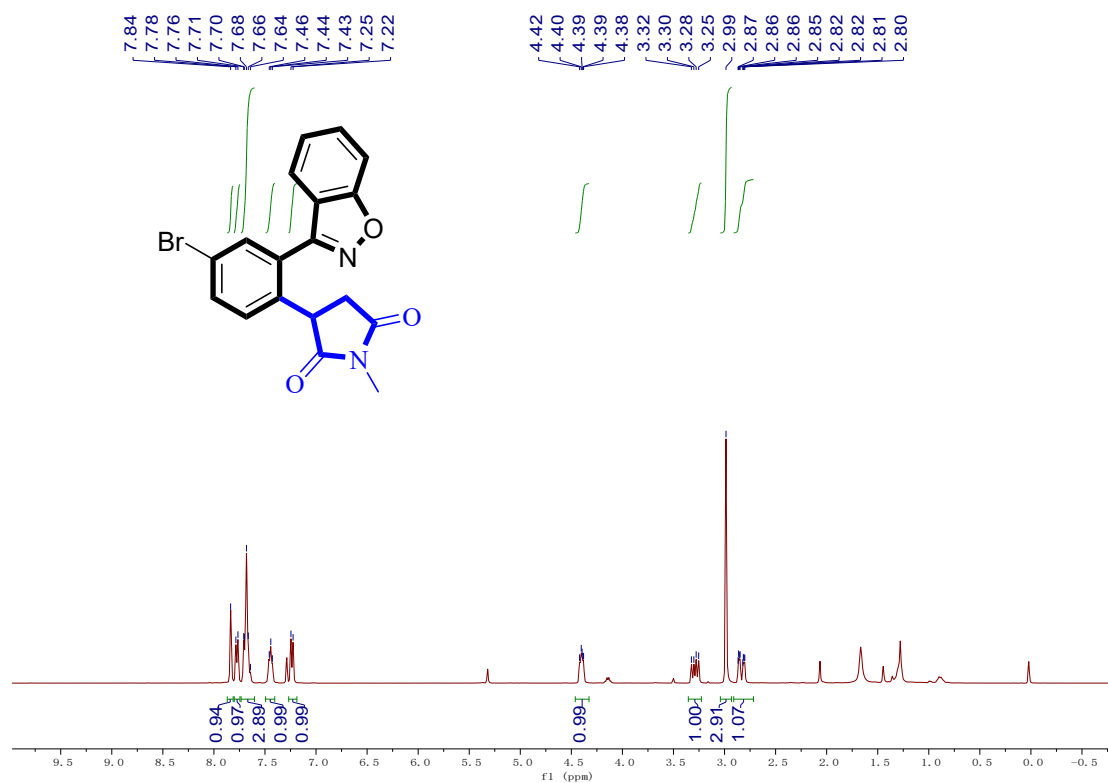

<sup>13</sup>C NMR (Chloroform-*d*) spectrum of **3ha**

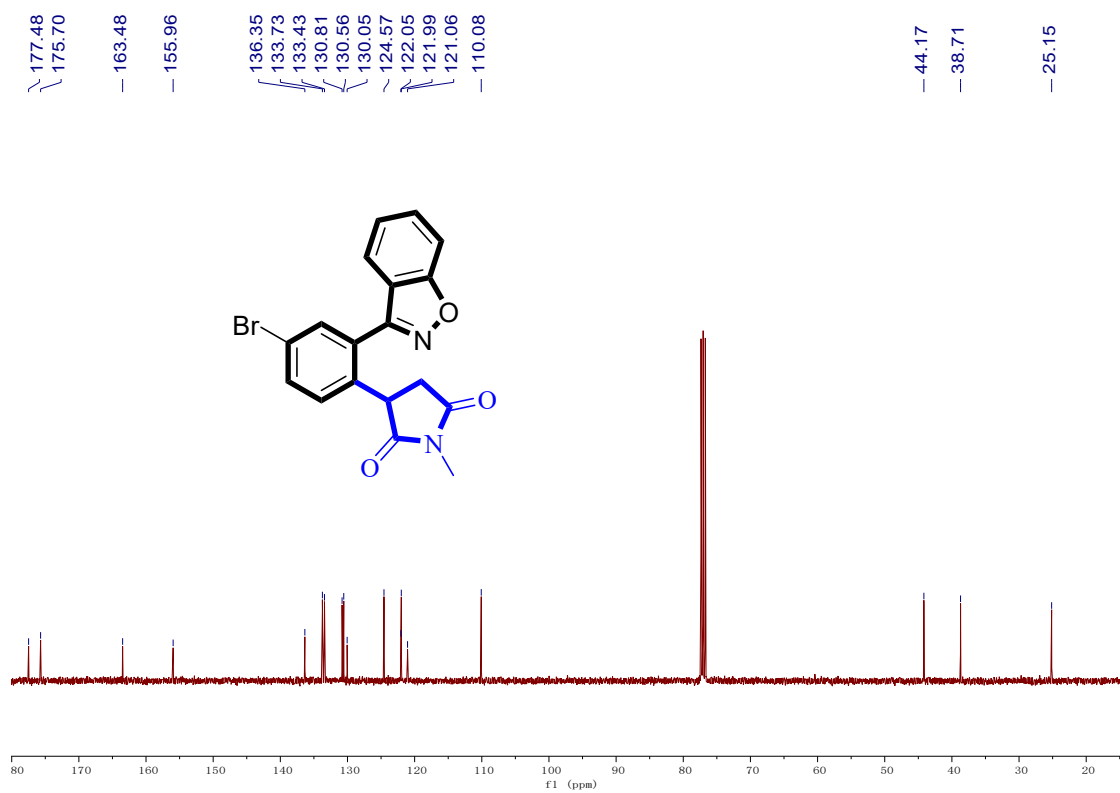



<sup>1</sup>H NMR (Chloroform-*d*) spectrum of **3ia**

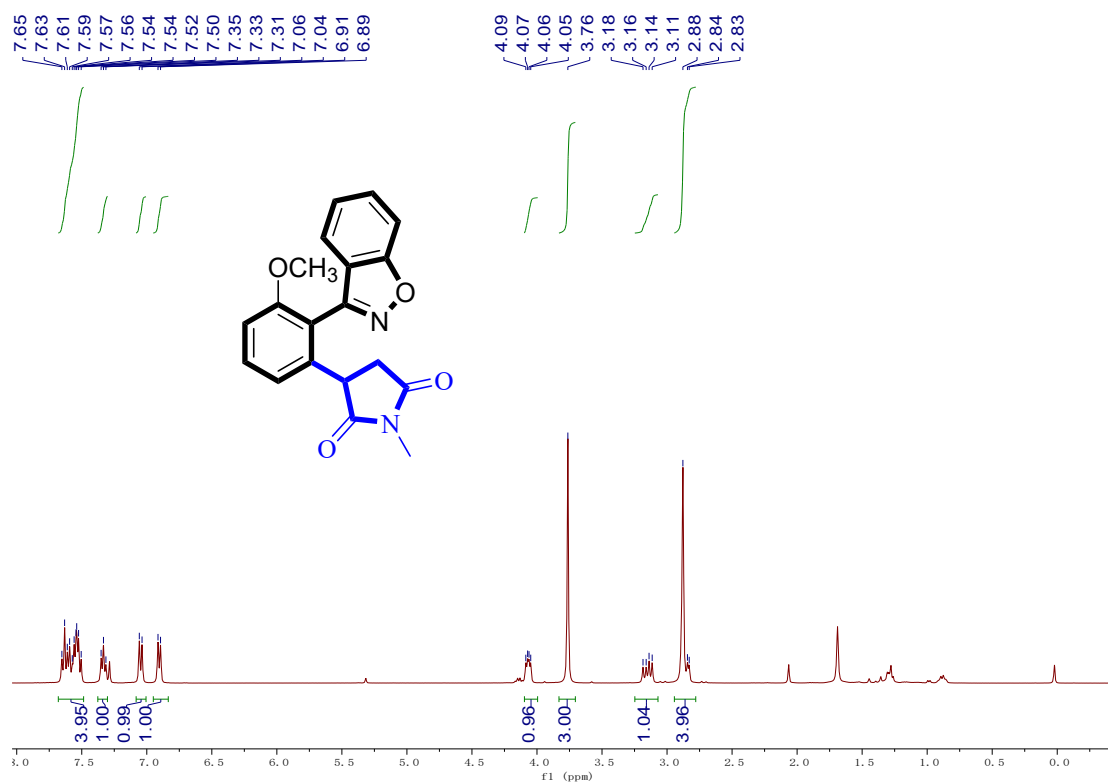

<sup>13</sup>C NMR (Chloroform-*d*) spectrum of **3ia**

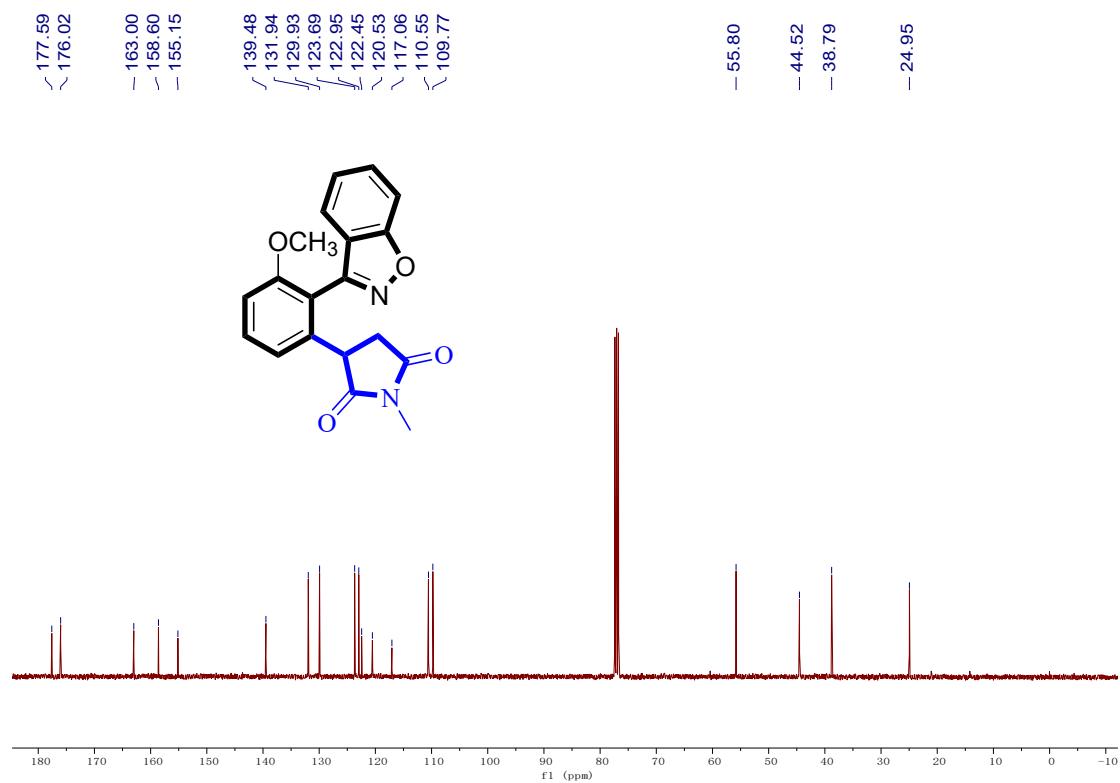

<sup>1</sup>H NMR (Chloroform-*d*) spectrum of **3ja**

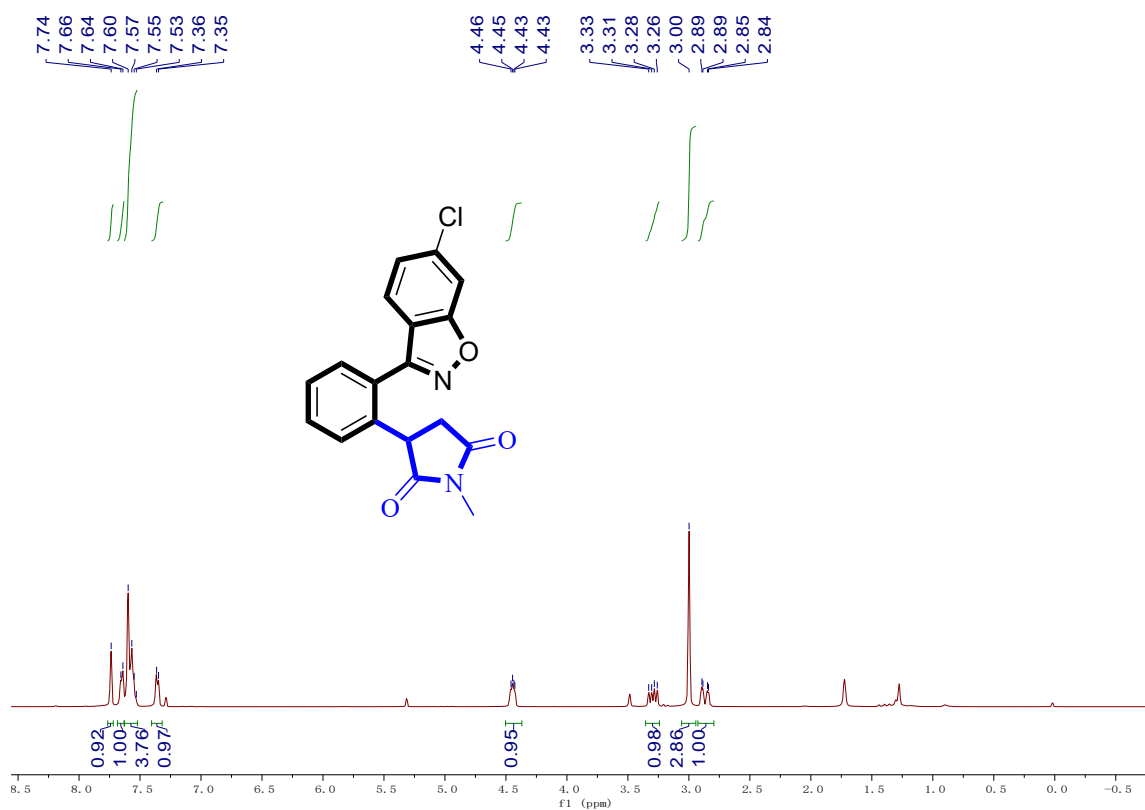

<sup>13</sup>C NMR (Chloroform-*d*) spectrum of **3ja**

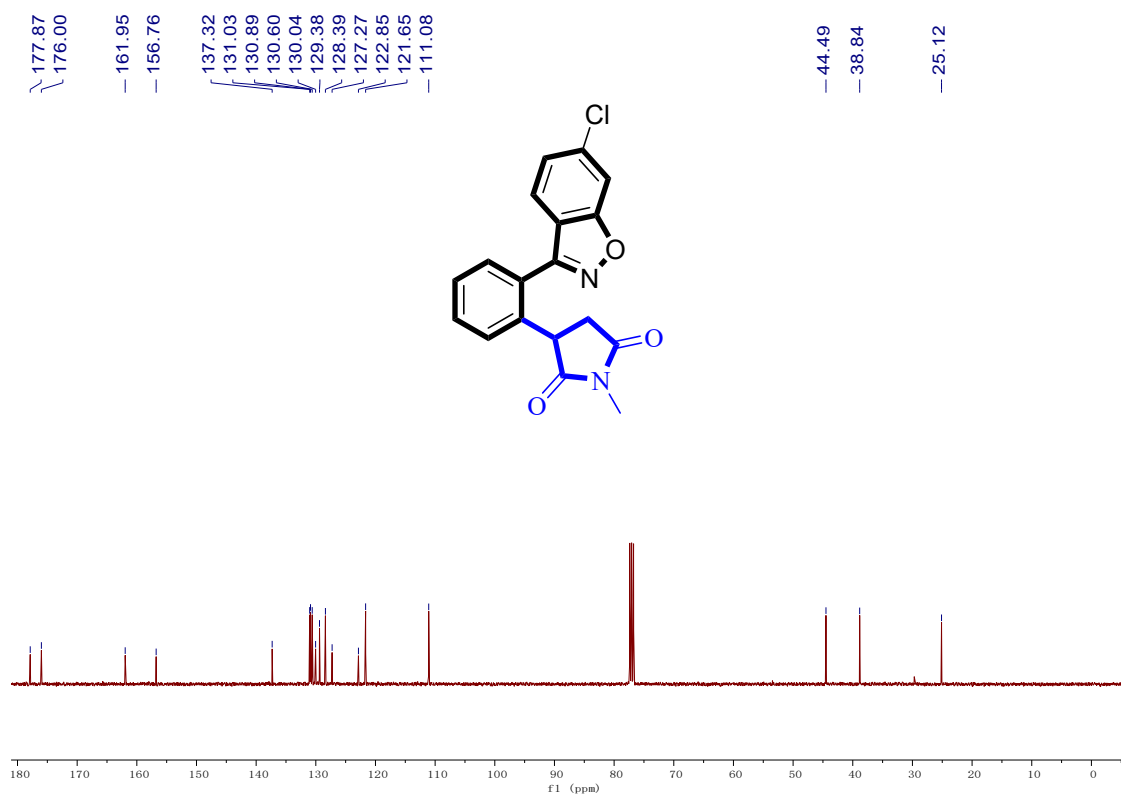

<sup>1</sup>H NMR (DMSO-*d*<sub>6</sub>) spectrum of **3ka**

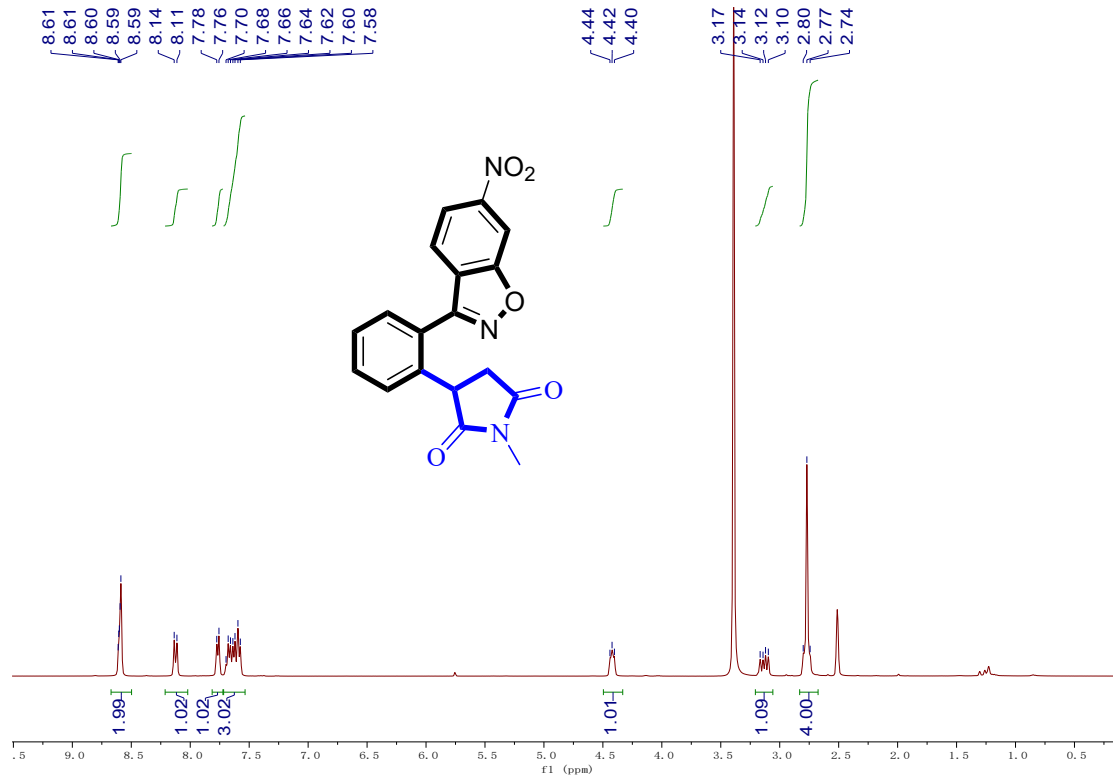

<sup>13</sup>C NMR (DMSO-*d*<sub>6</sub>) spectrum of **3ka**

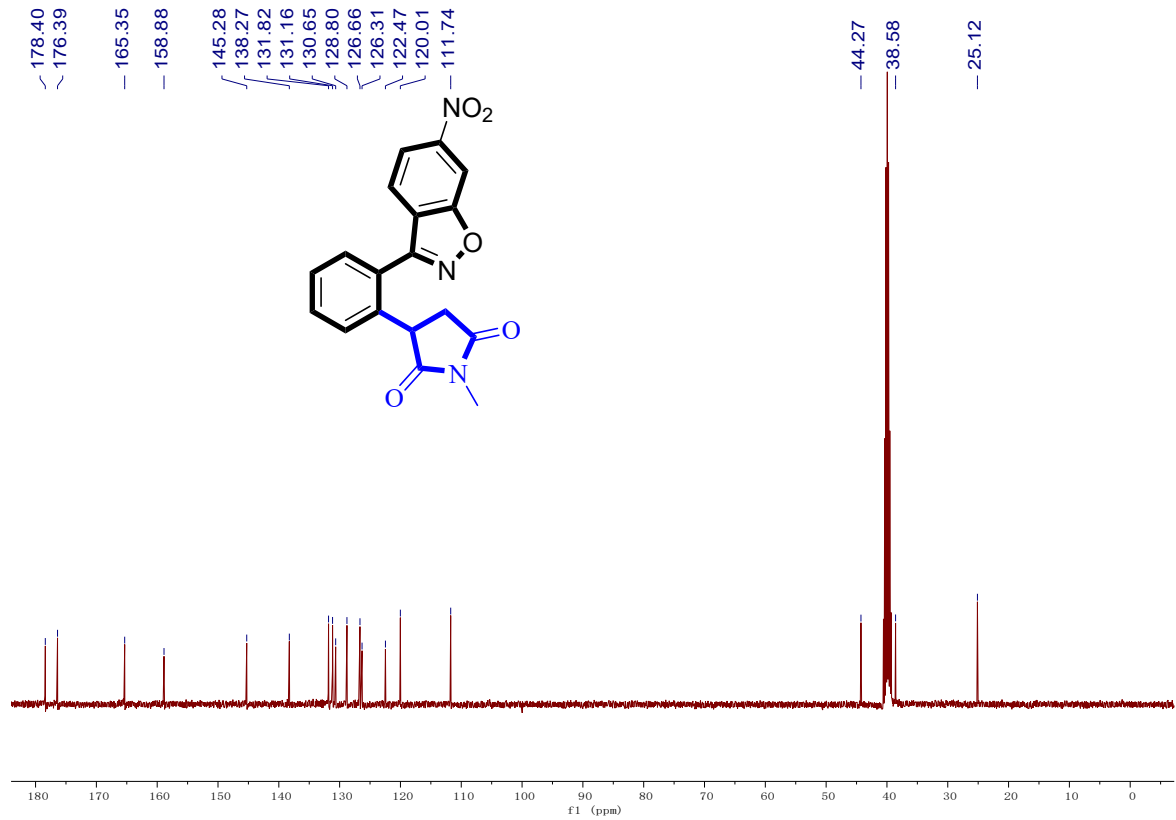

<sup>1</sup>H NMR (Chloroform-*d*) spectrum of **3la**

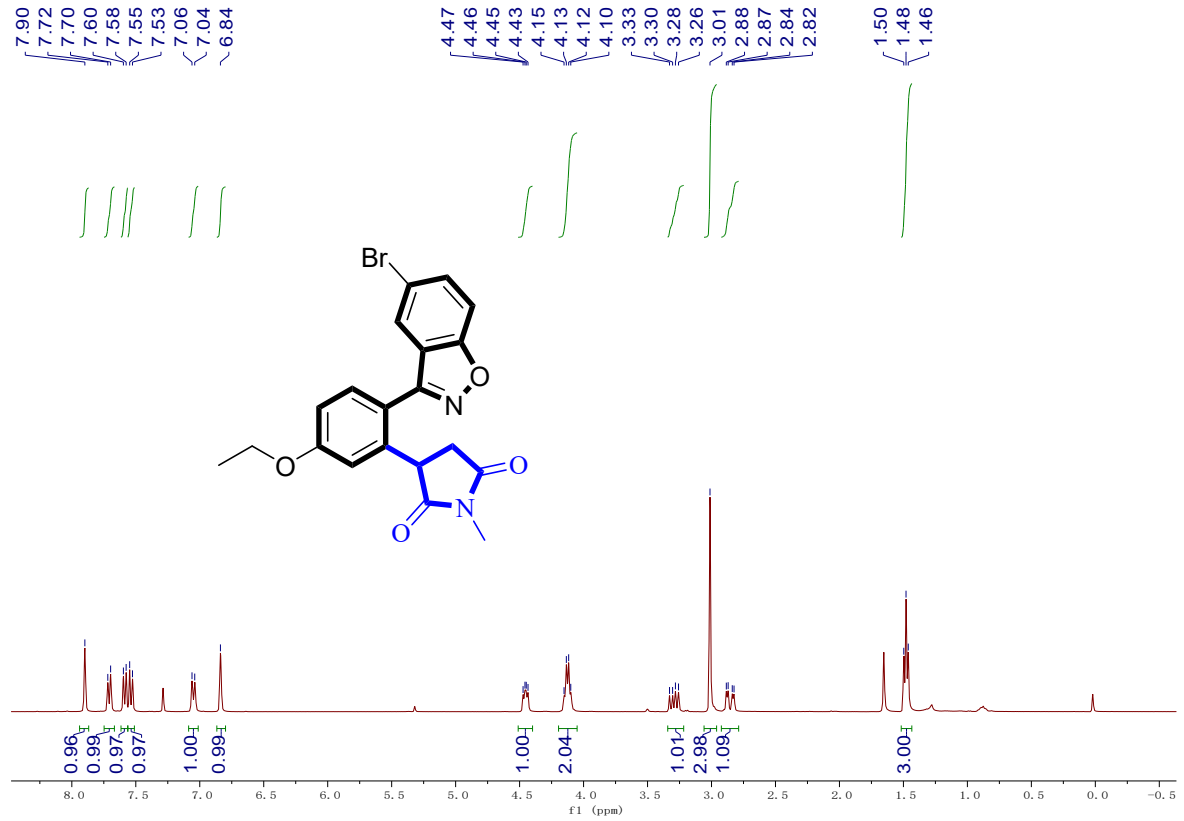

<sup>13</sup>C NMR (Chloroform-*d*) spectrum of **3la**

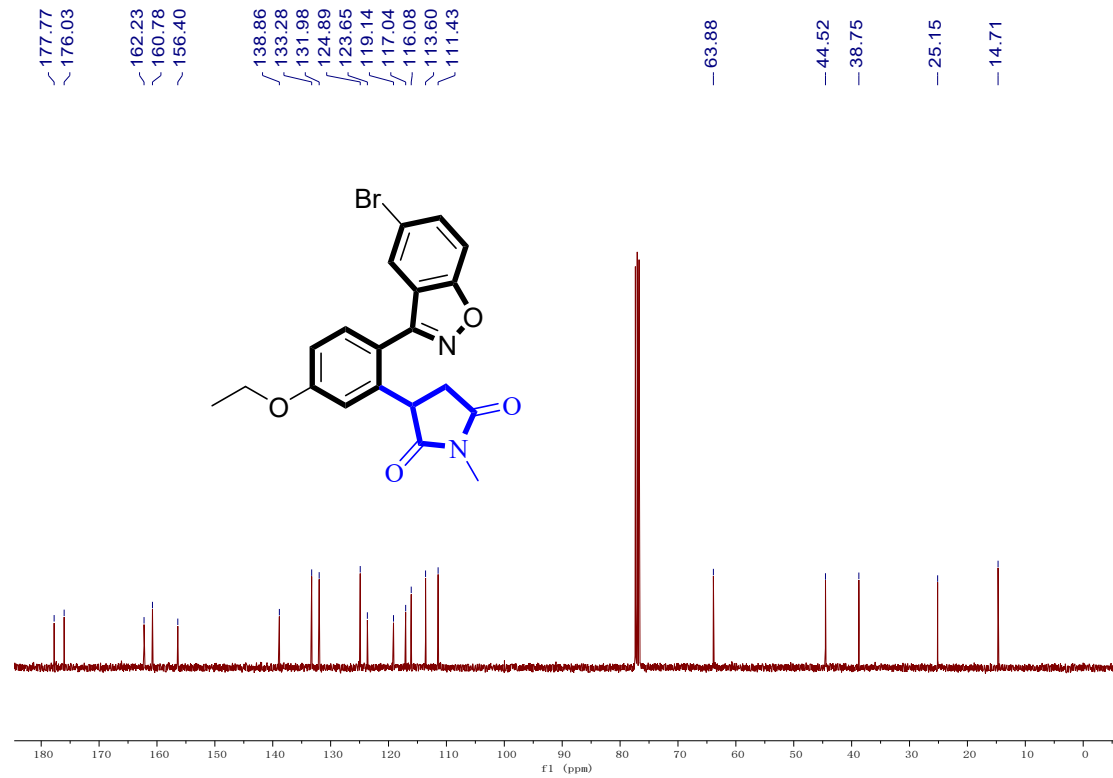

<sup>1</sup>H NMR (Chloroform-*d*) spectrum of **3ab**

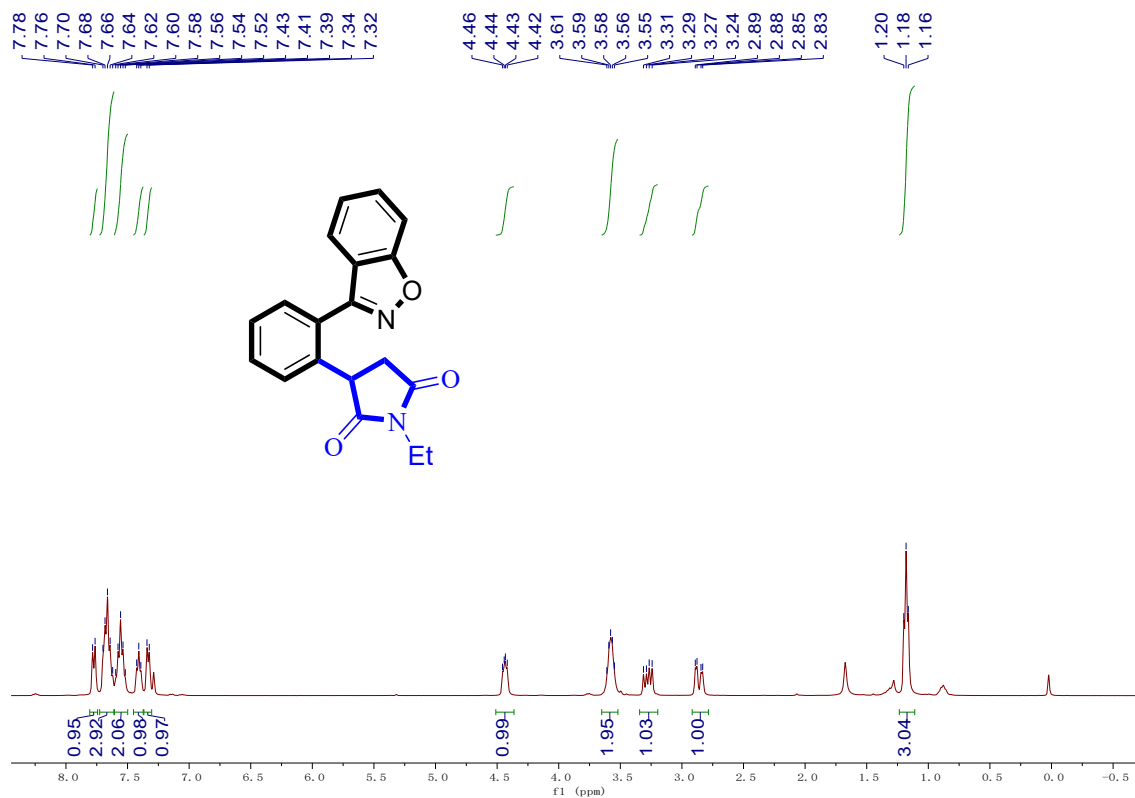

<sup>13</sup>C NMR (Chloroform-*d*) spectrum of **3ab**

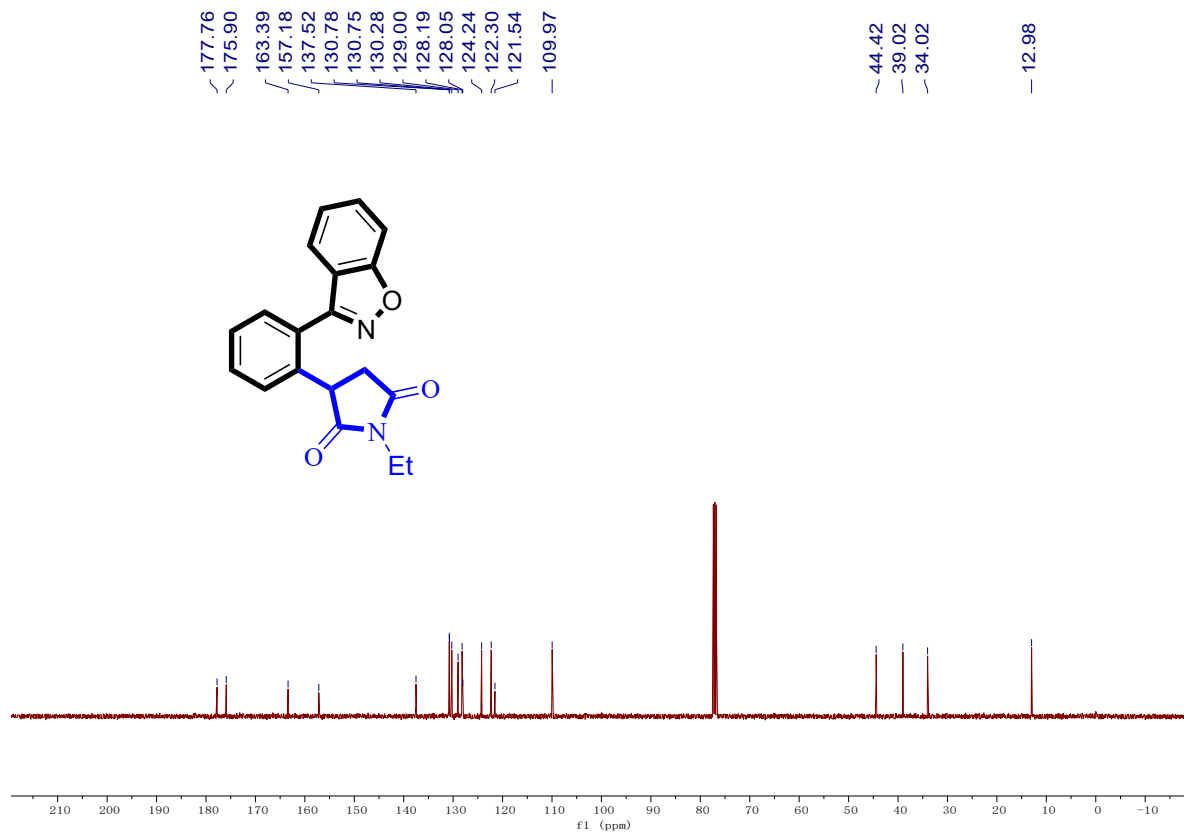

<sup>1</sup>H NMR (Chloroform-*d*) spectrum of **3ac**

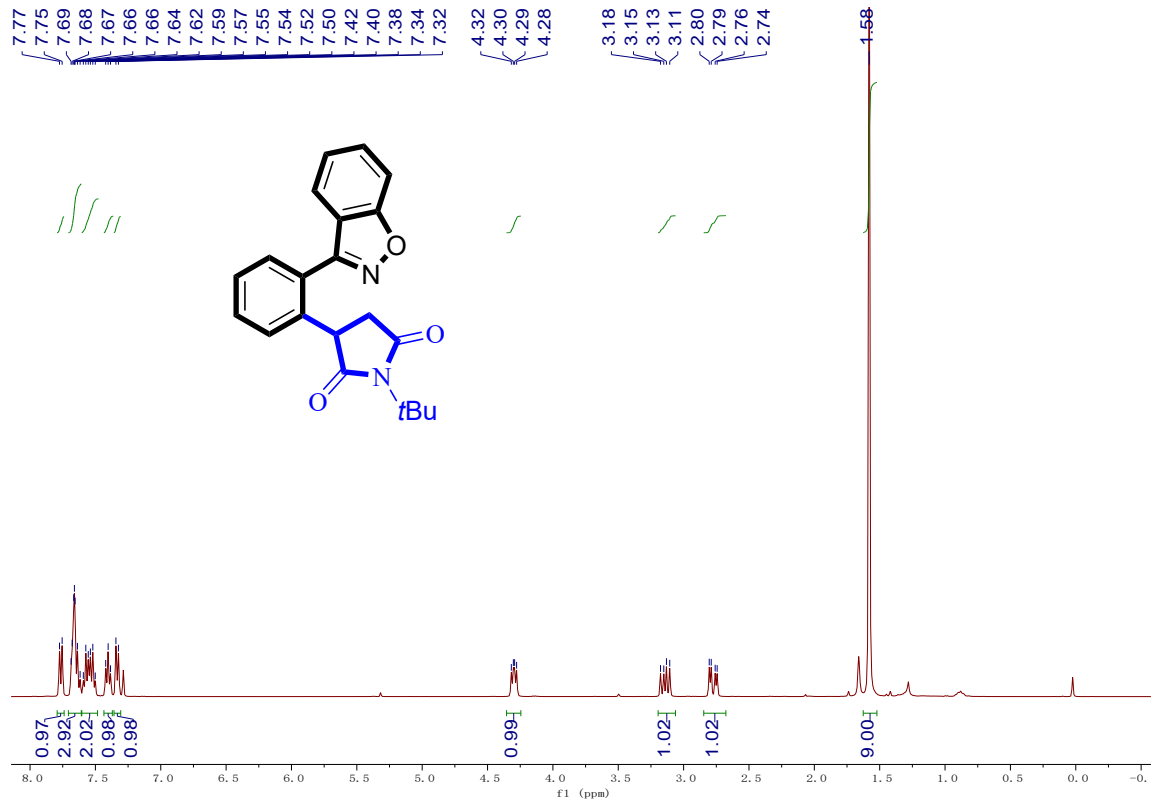

<sup>13</sup>C NMR (Chloroform-*d*) spectrum of **3ac**

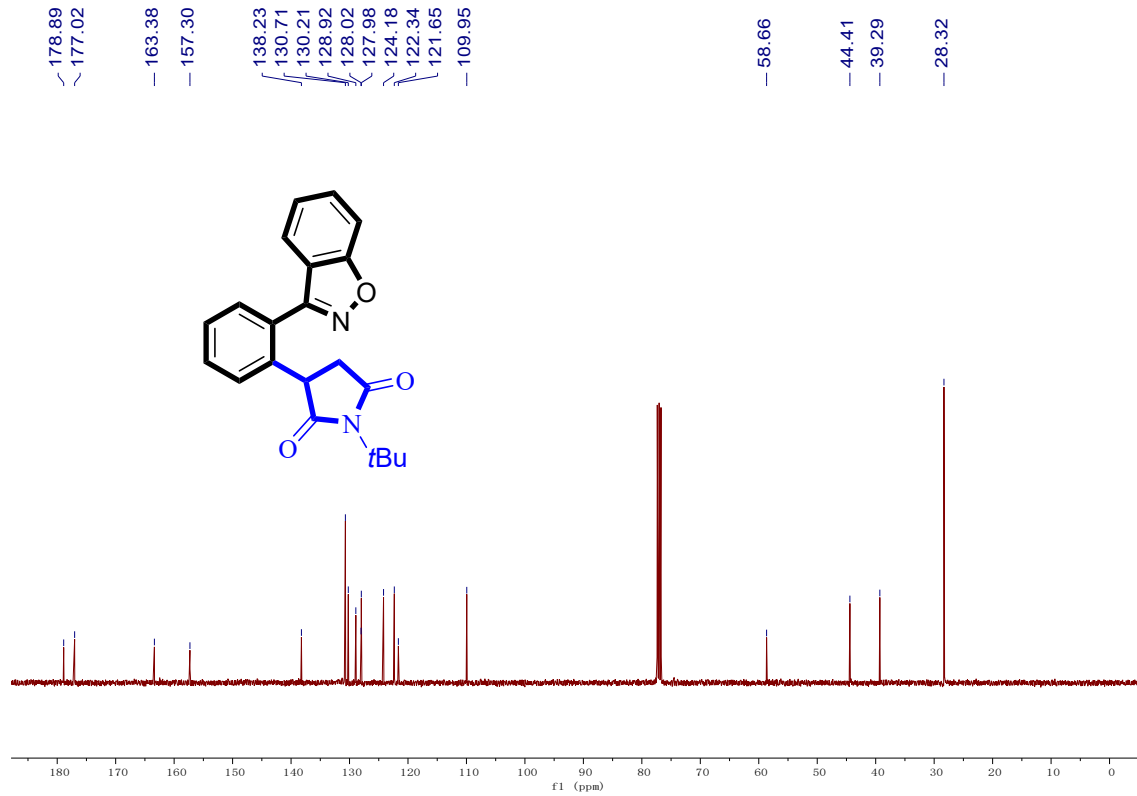

<sup>1</sup>H NMR (Chloroform-*d*) spectrum of **3ad**

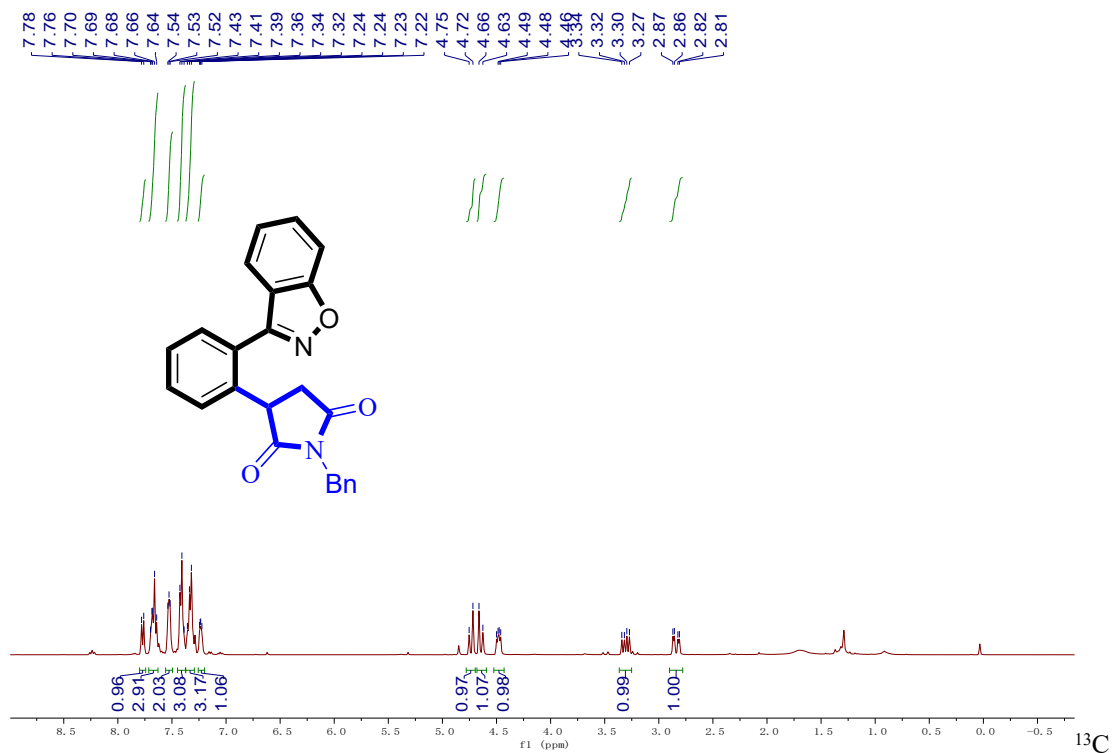

NMR (Chloroform-*d*) spectrum of **3ad**

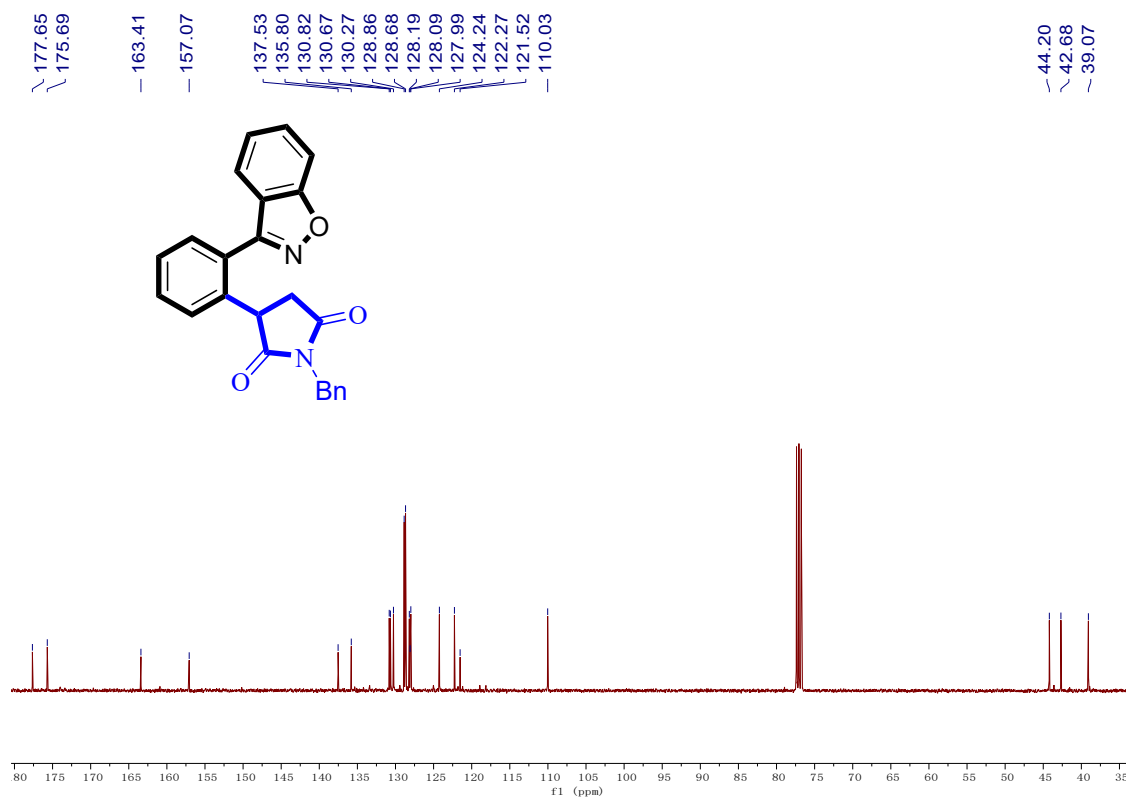

<sup>1</sup>H NMR (Chloroform-*d*) spectrum of **3ae**

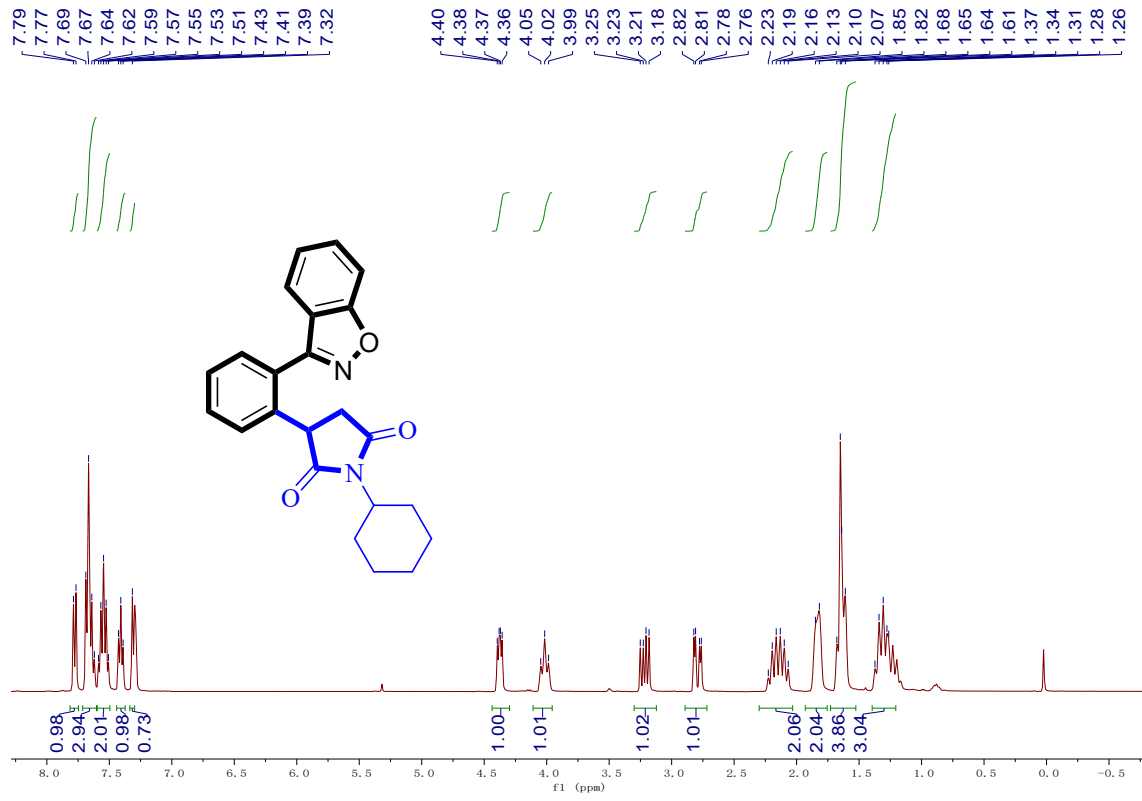

<sup>13</sup>C NMR (Chloroform-*d*) spectrum of **3ae**

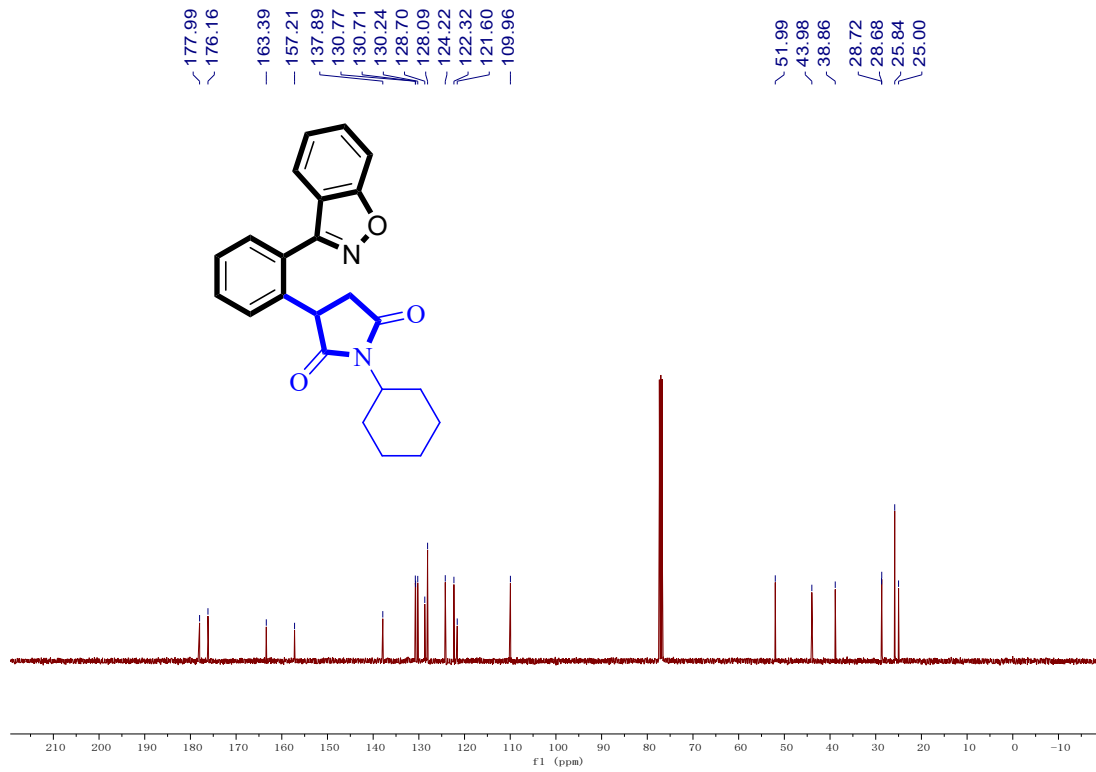



<sup>1</sup>H NMR (Chloroform-*d*) spectrum of **3af**

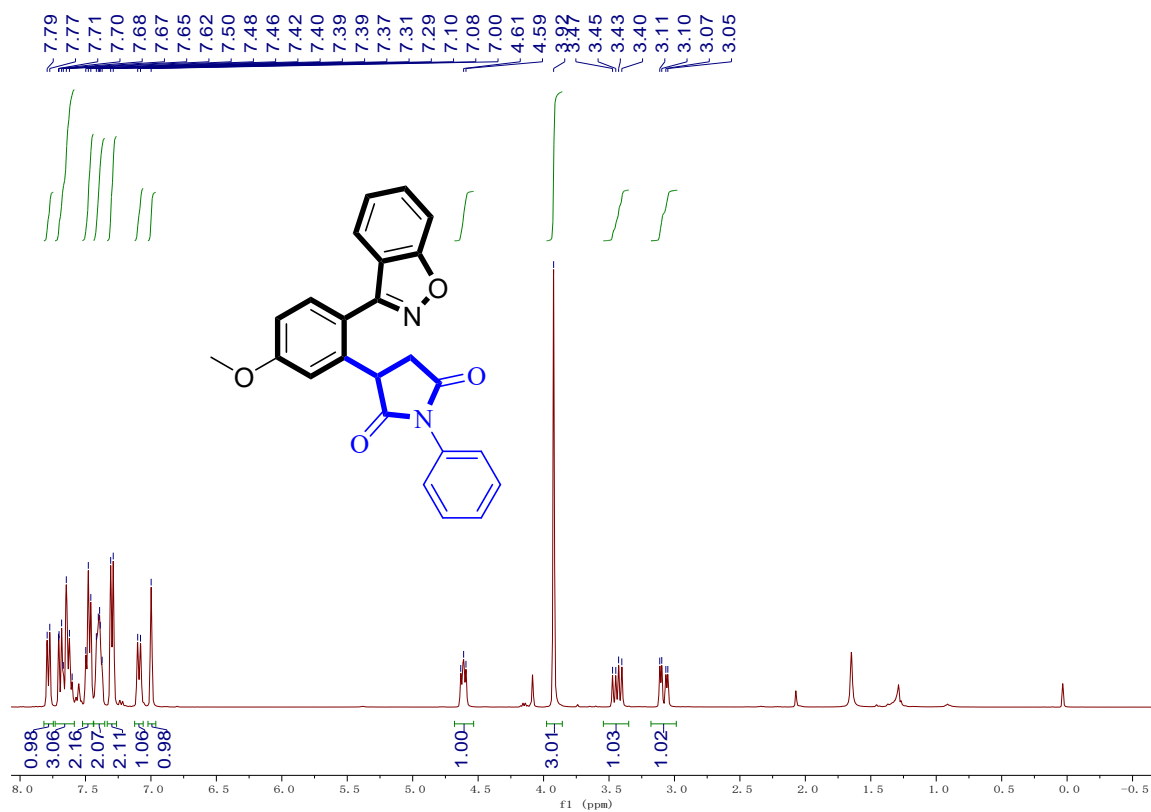

<sup>13</sup>C NMR (Chloroform-*d*) spectrum of **3af**

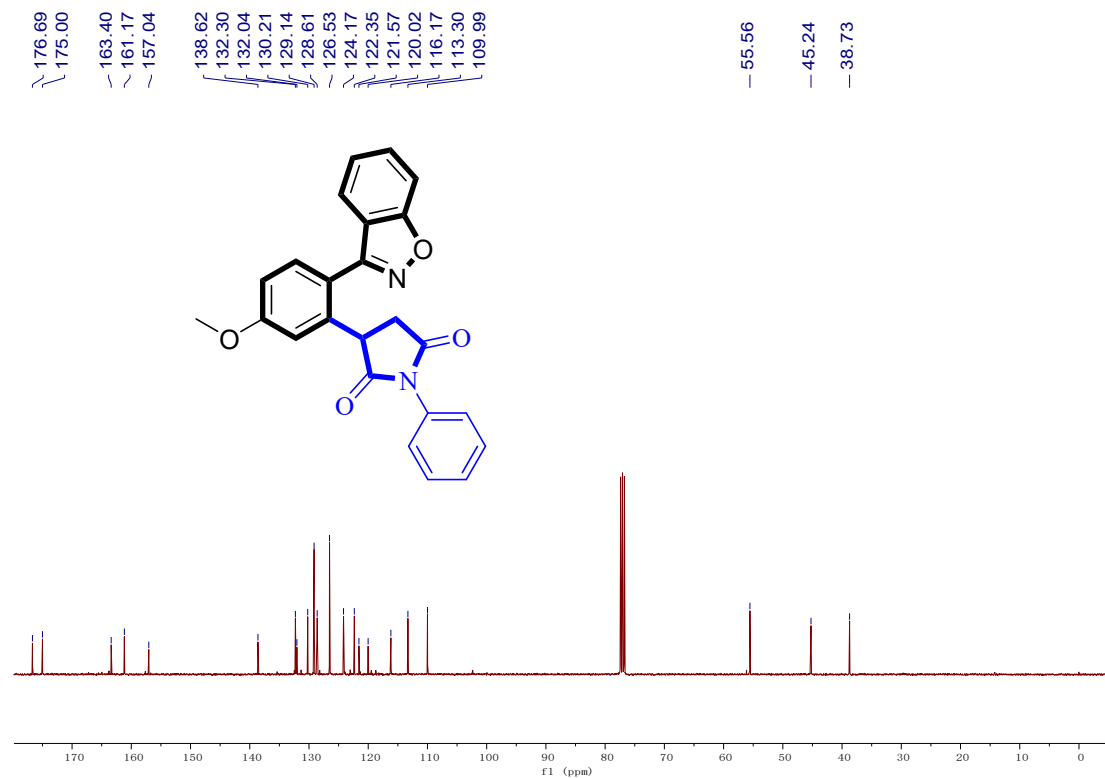

<sup>1</sup>H NMR (Chloroform-*d*) spectrum of **3ag**

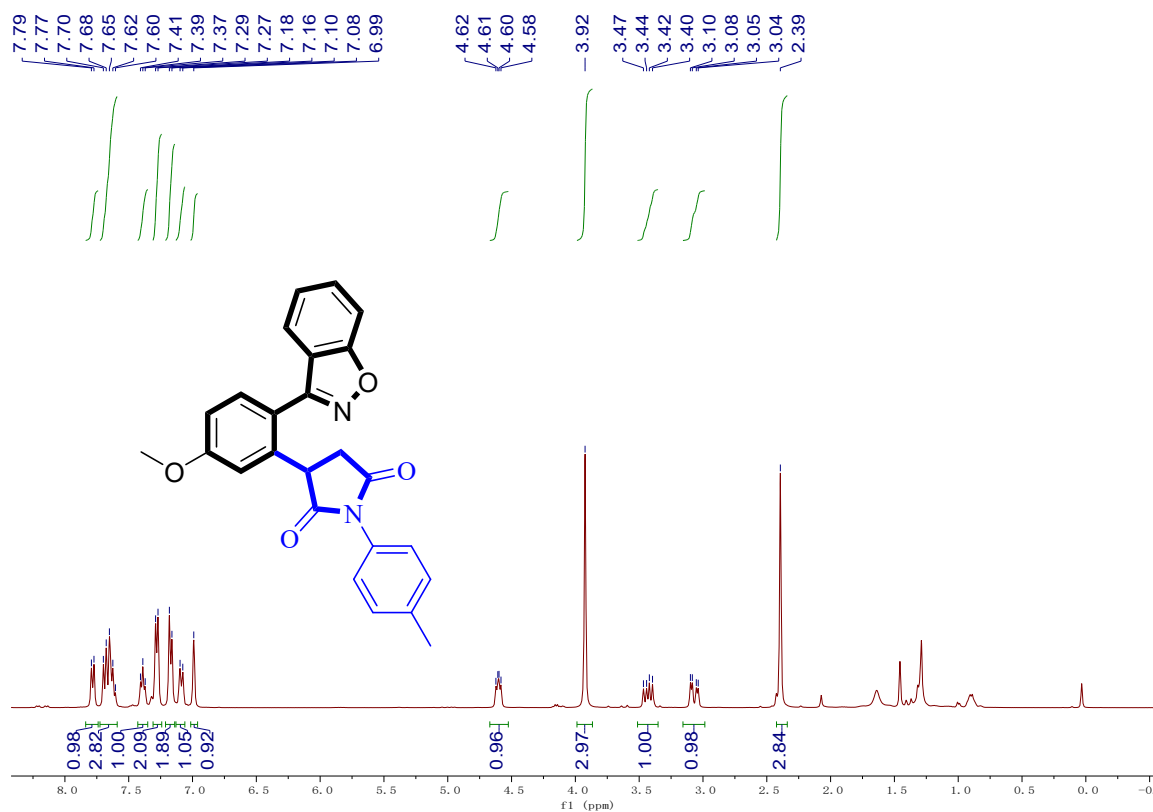

<sup>13</sup>C NMR (Chloroform-*d*) spectrum of **3ag**

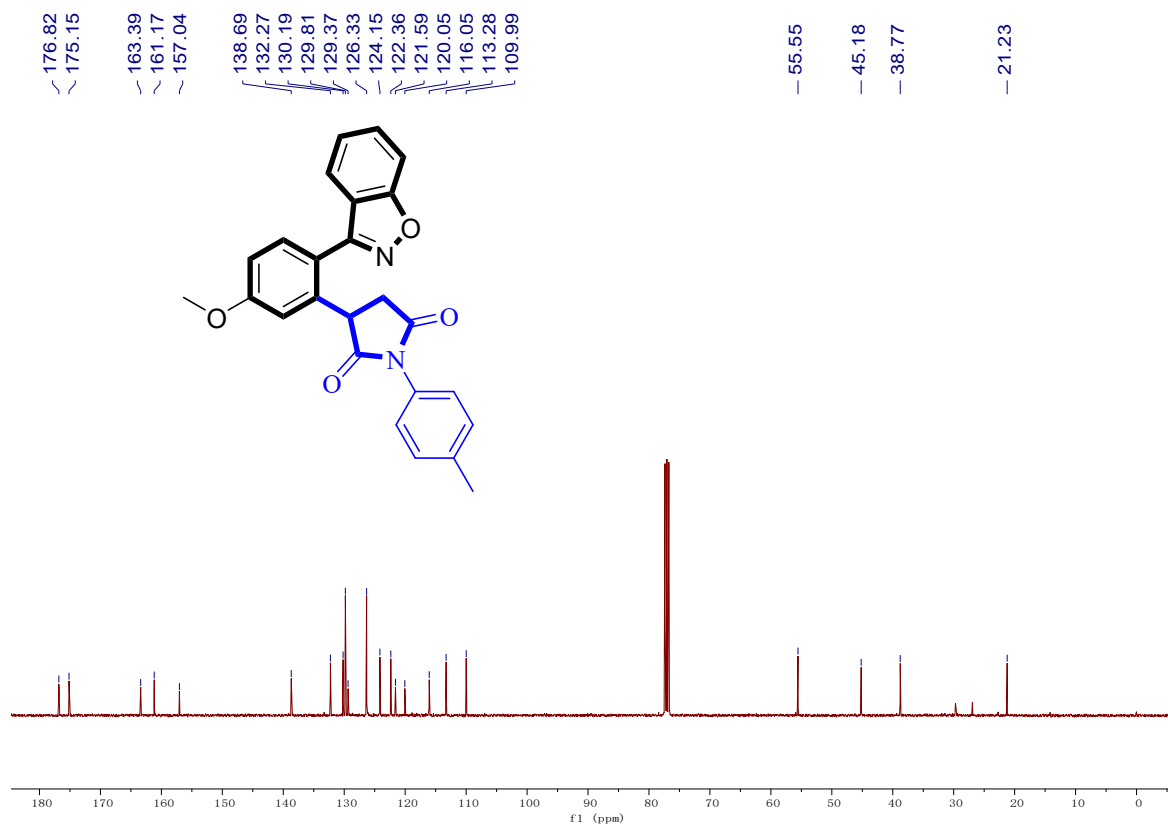

<sup>1</sup>H NMR (Chloroform-*d*) spectrum of **3ah**

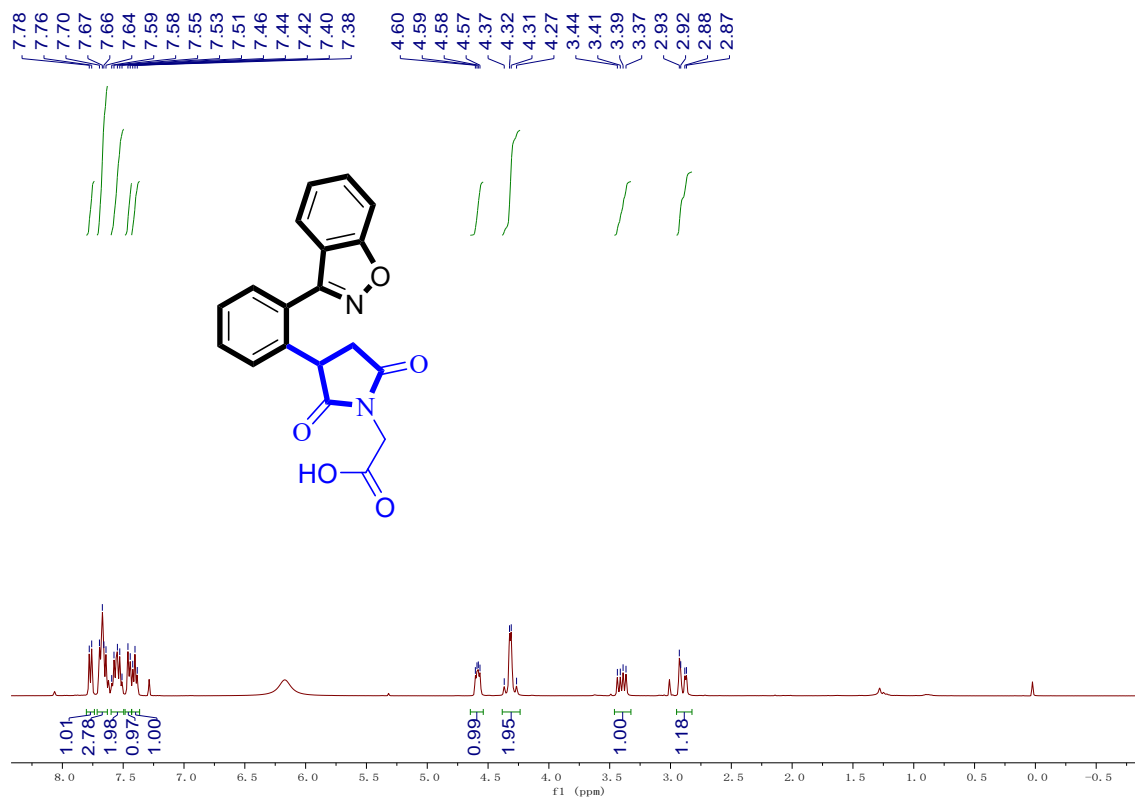

<sup>13</sup>C NMR (Chloroform-*d*) spectrum of **3ah**

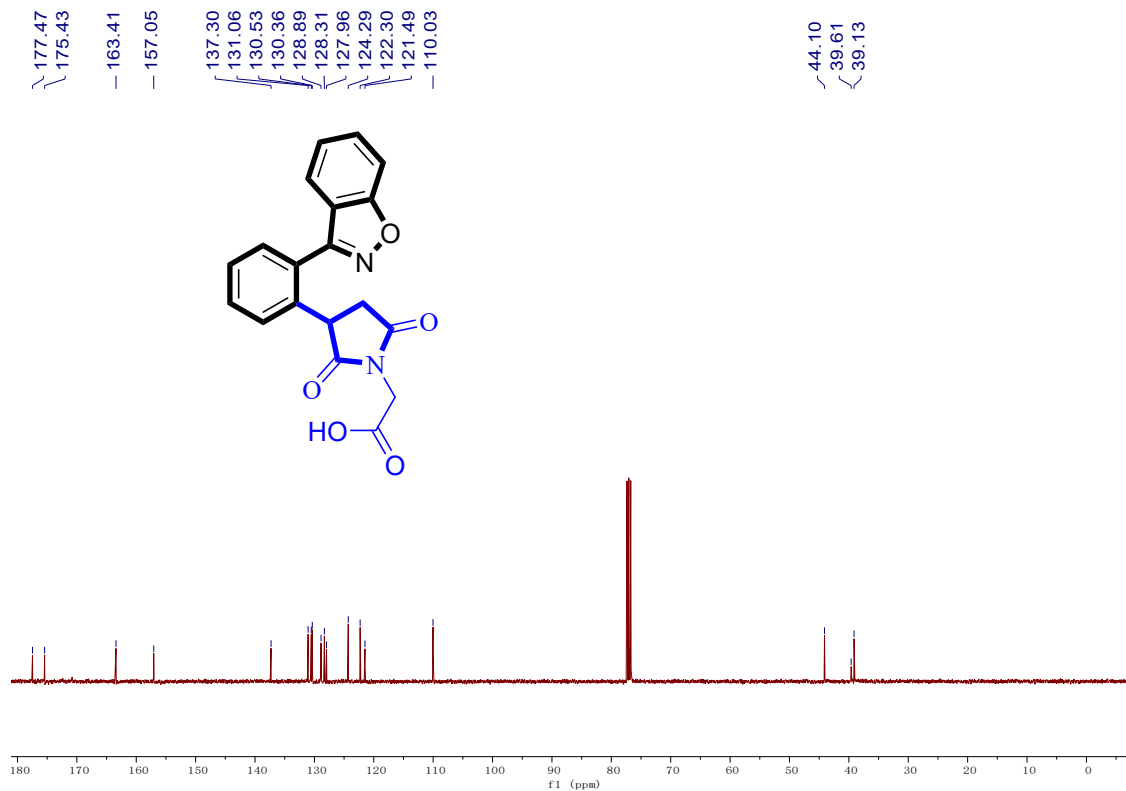

<sup>1</sup>H NMR (Chloroform-*d*) spectrum of **3ai**

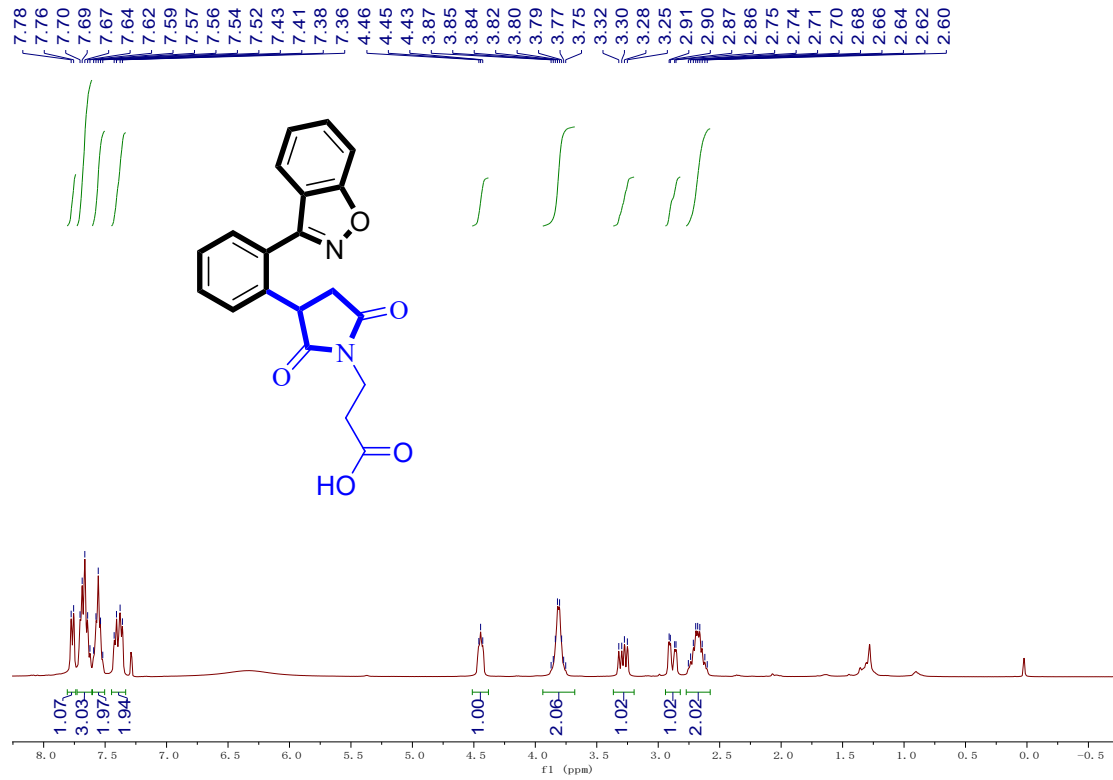

<sup>13</sup>C NMR (Chloroform-*d*) spectrum of **3ai**

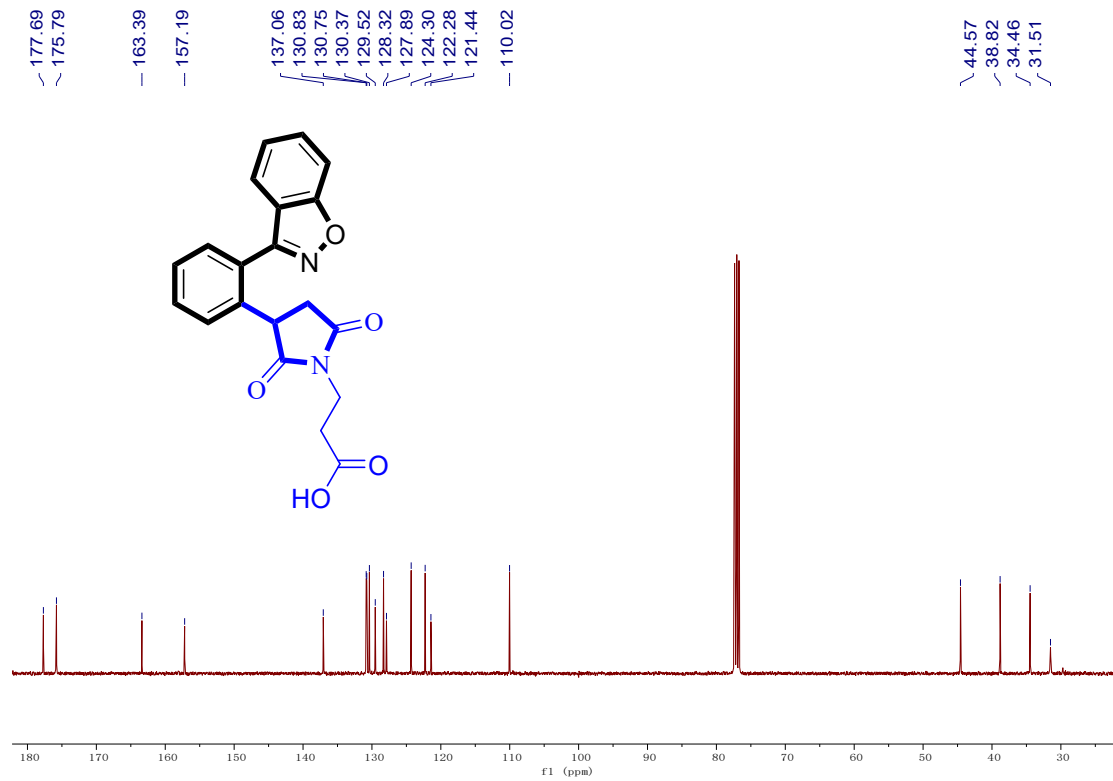

Supplement: d3ob00851g1.pdf [file d3ob00851g1.pdf]
